# Supplementary material for: Analysis of CYP2C19 gene polymorphism and influencing factors of pharmacological response of clopidogrel in patients with cerebral infarction in Zhejiang, China
Source: Frontiers journal article supplement (doi:10.3389/fcvm.2023.1020593), 2023-02-02
Supplement: Table_1.XLS [file Table_1.XLS]

## Sheet: 总表
姓名	性别	年龄	诊断	2型糖尿病	高血压	rs4244285	rs4986893	rs12248560	基因型	代谢型	血栓风险评分表	HDL	LDL	GLU	同型半胱	糖化	ADP末次结果	甘油三酯	胆固醇	中性粒细胞淋巴细胞		血小板平均体积	血小板
郑正海	男	69	脑梗死	否	是	G/G	G/G	C/C	*1/*1	快代谢型	0	1.15	3.99	4.9	7	5.4	89.2	0.87	2.51	7.3	0.9	10.7	258
胡郎明	男	79	脑梗死	否	是	G/G	G/G	C/C	*1/*1	快代谢型	2	1.41	3.57	4.35	6	6.1	83.7	1.18	5.48	3.1	0.9	10.8	136
李家兵	男	58	脑梗死	否	是	G/A	G/G	C/C	*1/*2	中间代谢型	3	1.06	3.14	4.59	12	5.7	81.4	3.05	4.94	4.2	1.8	10.1	310
张兴权	男	61	脑梗死	否	否	A/A	G/G	C/C	*2/*2	慢代谢型	3	1.11	4.48	5.94	8.9	6	79.3	2.06	6.08	6.3	3.5	12.4	126
杨秀琴	女	56	脑梗死	否	是	G/A	G/G	C/C	*1/*2	中间代谢型	2	1	3.34	6.37	12	5.3	74.7	1.6	4.54	2.6	1.3	11.2	154
陈建章	男	66	脑梗死	是	是	G/G	G/G	C/C	*1/*1	快代谢型	0	0.84	2.2	7.1	11	11.2	74.3	1.24	3.3	4.4	1.4	12.2	178
徐安民	男	63	脑动脉供血不足	否	是	G/A	G/G	C/C	*1/*2	中间代谢型	0	0.87	1.73	7.39	11	7.9	72.8	1.06	2.82	6.1	1.7	11.4	250
闫会英	女	75	脑梗死	否	是	G/A	G/A	C/C	*2/*3	慢代谢型	1	0.93	2.84	5.03	12	5.4	72.5	2.9	5.4	2.7	1.2	10.8	182
唐小飞	女	66	脑梗死	否	是	G/A	G/G	C/C	*1/*2	中间代谢型	1	1.24	2.29	4.97	8	5.4	72.4	1.2	3.79	4.6	1.6	10.6	296
黄国娟	女	65	脑梗死	否	是	G/G	G/G	C/C	*1/*1	快代谢型	0					6.7	71.7	5.09	4.42	9.1	2.1	10.1	336
金福浪	男	61	颈动脉狭窄	否	否	G/G	G/G	C/C	*1/*1	快代谢型	0	0.96	3.43	4.29	8	5.4	71.4	1.09	4.88	3.4	1.4	10.8	202
欧世苗	男	74	右侧颈内动脉狭窄	是	是	G/A	G/G	C/C	*1/*2	中间代谢型	1	0.98	1.34	7.81	13	7	71.1	0.52	2.33	4.2	1.1	10.5	162
徐开山	男	70	脑梗死	是	是	A/A	G/G	C/C	*2/*2	慢代谢型	2	0.91	1.68	5.83	13.9	5.6	70.8	2.1	6.8	5.9	2.2	10.1	332
唐仁意	女	66	脑梗死	否	是	G/G	G/G	C/C	*1/*1	快代谢型	0	1.02	3.37	4.9	19	5.6	70.2	1.15	4.78	1.9	1.5	10.4	191
江志豪	男	18	多发性脑梗死	否	否	A/A	G/G	C/C	*2/*2	慢代谢型	1	1.26	1.84	4.24	16	5.1	70.2	0.59	3.23	5.9	2	10.5	233
周连宝	男	72	脑梗死	否	否	G/A	G/G	C/C	*1/*2	中间代谢型	2	0.87	2.16	4.13	11	5.8	70.2	0.83	3.36	5.6	1.7	10.6	430
周兰珍	女	58	脑梗死	否	是	G/A	G/A	C/C	*2/*3	慢代谢型	1						69.5	1.78	5.88	4.6	2.6	9.9	319
潘明和	男	53	脑梗死	否	是	G/A	G/G	C/C	*1/*2	中间代谢型	0	0.84	3.12	4.28	16	4.6	68.8	0.62	4.96	4.8	0.8	10.1	334
穆恩法	男	73	椎动脉狭窄	否	否	G/A	G/G	C/C	*1/*2	中间代谢型	1	1.28	1.75	4.38	9	5.2	68.5	0.64	3.05	3.4	1.1	10.8	163
邓书军	男	61	脑梗死	否	是	G/G	G/G	C/C	*1/*1	快代谢型	1	1	3.64	5.2	6	5.6	68.3	1.09	5.02	4.8	1.8	9.1	196
陆绪贵	男	63	脑梗死	否	是	G/G	G/G	C/C	*1/*1	快代谢型	1	0.75	1.73	8.66	11	8.5	68.1	2.05	2.78	3.7	0.9	11.7	169
王亚琴	女	66	晕厥	否	否	G/A	G/G	C/C	*1/*2	中间代谢型	0	1.36	4.19	5.53	11	6.2	67.8	1.37	6.9	8.8	1.3	9.8	263
叶玉英	女	74	颈内动脉狭窄	否	是	G/A	G/A	C/C	*2/*3	慢代谢型	2	0.65	3	4.24		8.1	66.8	3.14	4.34	5.3	1.4	10.7	222
葛雅芬	女	75	大脑中动脉闭塞和狭窄	是	是	G/G	G/A	C/C	*1/*3	中间代谢型	2	0.86	2.85	8.01	49	9.1	66.6	1.49	4.01	3	2	11.3	228
李质生	男	68	右侧多发性脑梗死	否	是	A/A	G/G	C/C	*2/*2	慢代谢型	1	0.95	1.6	6.32	6	6.6	66.6	0.89	2.65	3.6	1.9	10.6	207
陈孟甫	男	73	短暂性大脑缺血性发作	否	是	A/A	G/G	C/C	*2/*2	慢代谢型	2	0.97	2.63	5.49	12	6.4	66.5	0.97	3.91	3.7	1.4	10.7	214
陈仁生	男	79	脑梗死	否	否	G/G	G/G	C/C	*1/*1	快代谢型	5	1.45	3.44	6.05		6.5	66.3	0.84	3.78	4.3	1.3	11.7	230
张立甫	男	60	脑梗死	否	是	G/G	G/G	C/C	*1/*1	快代谢型	0	1.23	4.6	4.73	7	5.9	65.2	1.84	6.48	3.9	1.3	10.35	379
殷建华	男	58	脑梗死	否	否	G/A	G/G	C/C	*1/*2	中间代谢型	4	0.83	2.56	4.93	14	5	64.8	1.17	3.78	6.5	1.3	9.4	183
王全民	男	62	脑梗死	否	是	G/A	G/G	C/C	*1/*2	中间代谢型	1	0.86	2.98	4.73	11	5.3	64.6	1.2	4.17	9	1	10	180
张海滨	男	51	脑梗死个人史	是	否	G/A	G/G	C/C	*1/*2	中间代谢型	0	0.73	4.44	7.7	9	7.9	64.3	1.11	3.95	4	2.1	9.6	283
金登云	男	75	脑梗死	否	是	G/G	G/G	C/C	*1/*1	快代谢型	2	1.29	3.42	4.78	6	5.7	63.7	1.19	5.47	3.7	2.3	11.9	224
董翠梁	女	71	脑梗死	是	是	G/A	G/G	C/C	*1/*2	中间代谢型	1	1.12	4.19	9.8	16	8.4	63.4	1.29	5.99	2.3	3	12.6	148
马国生	男	48	顶枕叶脑梗死	否	否	G/A	G/G	C/C	*1/*2	中间代谢型	1	0.79	3.49	5.27	13	5.6	62.8	1.64	4.73	4.1	1.9	9.1	325
蒋杏根	男	64	头晕和眩晕	否	否	G/A	G/A	C/C	*2/*3	慢代谢型	0	0.89	2.47	4.32	11	5.3	62.5	1.31	3.81	4.2	1.7	9.5	232
孙国其	男	76	晕厥	否	否	A/A	G/G	C/C	*2/*2	慢代谢型	1	0.95	2.07	4.53	14	5.2	62.5	0.94	3.44	4.66	1.4	10.6	157
沈耀水	男	75	短暂性大脑缺血性发作	否	否	A/A	G/G	C/C	*2/*2	慢代谢型	2	1.36	1.82	4.29	12	6	62.3	0.61	3.48	3.5	1.4	11.2	205
戴能兰	女	54	脑梗死	否	否	G/A	G/G	C/C	*1/*2	中间代谢型	1	0.83	3.82	4.54	11	5.1	62.2	1.15	5.28	4.3	1.7	11.1	259
陈明祥	男	63	左侧大脑中动脉闭塞	否	是	G/A	G/G	C/C	*1/*2	中间代谢型	1	0.82	3.12	4.31	9	6.2	62	1.67	3.24	2.8	1.3	11	197
许孝娣	女	61	右侧脑梗死	是	是	G/A	G/G	C/C	*1/*2	中间代谢型	2						62	1.3	5.66	6.6	1.8	11.6	253
余夏其	男	72	脑梗死	否	否	G/A	G/A	C/C	*2/*3	慢代谢型	1	1.48	3.05	2.77	13	5.3	61.8	1.25	4.81	8.5	0.4	10.4	211
林运昌	男	78	脑梗死	否	是	G/A	G/G	C/C	*1/*2	中间代谢型	0	0.84	1.87	4.74	15	6.7	61.2	0.92	2.98	3.7	1.4	10.2	349
杨世高	男	75	小脑梗死	否	是	G/A	G/G	C/C	*1/*2	中间代谢型	4						61.1	1.1	3.2	3.1	1.1	9.7	225
张亚琴	女	67	脑梗死	是	否	G/A	G/G	C/C	*1/*2	中间代谢型	1	1.77	3.25	6.97	12	6.9	60.8	0.86	4.61	3.7	2.5	10	307
林姣娣	女	81	脑梗死	否	否	G/A	G/A	C/C	*2/*3	慢代谢型	2	1.25	2.15	4.84			60.6	1.09	3.6	3.8	1.2	10	277
石恒利	男	74	颈内动脉狭窄	是	是	G/A	G/G	C/C	*1/*2	中间代谢型	1				12		60.6	1.3	5.7	8.4	0.9	11.9	138
张志华	男	45	脑梗死	否	是	G/A	G/G	C/C	*1/*2	中间代谢型	1	1.05	3.12	5.57	11	5.4	60.5	2.96	4.84	4.1	2	8.6	274
周明红	男	47	使用酒精引起的戒断状态	否	否	G/A	G/A	C/C	*2/*3	慢代谢型	0	1.01	2.55	3.69		5.6	60.5	0.64	3.86	3.3	2.3	11.7	179
尤佩娟	女	65	脑梗死	否	是	G/A	G/G	C/C	*1/*2	中间代谢型	1	1.08	2.26	7.78	20	6.9	60.5	1.21	3.68	2.8	1.7	10.4	202
鲍金定	男	74	脑梗死	否	是	G/A	G/G	C/C	*1/*2	中间代谢型	5	0.79	2.6	4.56	13		60.5	0.89	3.81	4	1.7	9.6	192
梁成芬	女	63	右侧颈内动脉闭塞	是	否	G/A	G/G	C/C	*1/*2	中间代谢型	0	1.35	2.17	6.68		8.4	60.4	1.25	3.96	2.5	2.1	10.4	206
国志建	男	54	大面积脑梗死	是	否	G/A	G/G	C/C	*1/*2	中间代谢型	1	0.84	3.4	13.59	14	9.3	60.3	3.09	4.99	8.5	0.8	10.8	270
汤志伟	男	66	脑梗死	是	是	G/A	G/G	C/C	*1/*2	中间代谢型	1	0.73	1.95	7.31		6	60.3	1.83	2.96	3.4	1.3	11	210
黄丁全	男	63	脑梗死	是	是	G/A	G/G	C/C	*1/*2	中间代谢型	0	0.98	3.03	6.74	14	6.8	59.7	1.64	4.48	7.8	1.7	10.9	221
杨德全	男	50	脑梗死	否	是	G/A	G/G	C/C	*1/*2	中间代谢型	1	0.96	2.32	4.95			59.5	1.15	3.57	4.4	1.3	12.1	220
张国泰	男	70	脑梗死	否	否	G/A	G/G	C/C	*1/*2	中间代谢型	1	1.19	3.01	4.54	16		59.4	1.16	4.46	4	1.3	10.4	270
石祖林	男	65	脑梗死	否	是	G/A	G/G	C/C	*1/*2	中间代谢型	1	1.03	2.87	4.34	14		59.3	1.51	4.48	6.6	1.7	12.1	298
柴孟尧	男	57	脑梗死	否	是	G/G	G/G	C/C	*1/*1	快代谢型	1	1.4	2.71	5.14	9		59	1.37	4.6	5.4	2.1	10.9	236
朱秀年	男	53	脑梗死	否	是	G/A	G/G	C/C	*1/*2	中间代谢型	0	0.92	1.74	5.38	14		58.9	1.13	2.9	2.3	1.6	9.5	311
吴桂芳	女	67	短暂性大脑缺血性发作	否	否	G/A	G/G	C/C	*1/*2	中间代谢型	2	1.36	3.1	5.81	14	5.6	58.5	1.36	7.75	1.3	1.4	10.4	212
赵明友	男	69	心室颤动电除颤后	否	是	G/A	G/G	C/C	*1/*2	中间代谢型	5	0.58	2.3	3.9	13	5.6	58.5	1.68	3.35	7.9	1.7	10.8	325
李云义	男	67	脑梗死	否	是	G/G	G/A	C/C	*1/*3	中间代谢型	1	0.83	3.28	5.58	10	5.7	58.2	2.43	4.75	7.8	2.1	10.9	188
张金会	男	66	脑梗死	是	是	G/G	G/A	C/T	*3/*17	中间代谢型	2	1.51	5.86	6.87	9	6.5	58	1.81	8.03	4.8	3.1	12.4	188
张才康	男	78	脑梗死	否	是	G/A	G/G	C/C	*1/*2	中间代谢型	2	0.75	1.81	7.31	12	6.6	57.9	1.36	4.97	4	1.5	9.5	277
蒋成荣	女	48	颈内动脉狭窄	是	否	G/A	G/G	C/C	*1/*2	中间代谢型	2	1.26	1.54	4.91	14		57.8	0.42	2.81	4	1.7	11.1	169
王维定	男	73	脑梗死	否	是	G/A	G/A	C/C	*2/*3	慢代谢型	2	1.22	3.99	6.48	13	5.9	57.8	1.67	6.25	3.5	1.3	11.4	202
李在菊	女	54	脑梗死	是	否	G/G	G/G	C/C	*1/*1	快代谢型	1	0.75	2.43	11.08	7	13.5	57.4	1.23	3.65	5.5	2.6	10.6	273
杨平安	男	74	脑梗死	否	否	G/G	G/G	C/C	*1/*1	快代谢型	2	1.41	2.41	4.26	10	5.3	56.8	0.99	4.07	7.6	1.2	10.9	201
陈杰伟	男	55	急性脑梗死	否	是	G/A	G/G	C/C	*1/*2	中间代谢型	2	1.47	2.66	4.53	10	5.1	56.8	1.08	4.4	8.2	1.4	10.1	239
黄金贵	男	40	主动脉夹层	否	否	G/A	G/G	C/C	*1/*2	中间代谢型	1						55.6	1.2	5.4	5.4	1.1	11	239
徐会军	男	49	脑梗死	否	是	G/A	G/G	C/C	*1/*2	中间代谢型	1	0.79	4.34	4.95	15	7.7	54.8	1.85	5.86	8	2.4	10.9	320
鲁建苗	男	66	双侧颈内动脉狭窄	是	是	G/G	G/A	C/C	*1/*3	中间代谢型	0	1.02	2.91	7.88	9	7.3	54.2	1.32	4.3	7.6	1.4	11.3	197
孙杰	男	45	脑梗死	是	否	G/A	G/G	C/C	*1/*2	中间代谢型	1	1.29	2.18	4.31	11	5.8	53.8	1.42	7.32	3.1	1.4	9.8	279
陈能照	男	52	多发性脑梗死	否	否	G/A	G/G	C/C	*1/*2	中间代谢型	1	0.84	1.59	4.67	14	5.2	52.8	0.96	2.6	2.6	1.3	10.6	123
胡亚飞	女	63	四肢乏力原因待查	否	是	G/G	G/G	C/C	*1/*1	快代谢型	0	1.12	3.55	4.55	9	5.3	52.8	1.58	5.25	4.2	1.6	11.1	240
王爱桂	女	62	2型糖尿病	是	是	G/A	G/G	C/C	*1/*2	中间代谢型	1	0.89	2.48	8.37	11	10.3	52.8	1.31	3.64	4.5	1.3	10.8	280
李会敏	男	47	小脑梗死	是	否	G/G	G/G	C/C	*1/*1	快代谢型	0	0.66	3.33	11.81	14	12	52.8	1.41	4.55	5.6	2.3	11.8	186
王士宏	男	67	脑梗死	否	是	G/A	G/G	C/C	*1/*2	中间代谢型	0	0.78	2.31	4.1	9	6.6	52.8	1.07	3.31	3.1	1.2	8.9	242
乔杰	男	60	多发性脑梗死	是	是	G/A	G/G	C/C	*1/*2	中间代谢型	1	1.06	2.89	7.42	12	7	52.8	3.24	4.5	4.8	2.9	9.6	201
王世衣	女	61	颈动脉狭窄	是	是	G/A	G/A	C/C	*2/*3	慢代谢型	0	1.28	4.51	6.13	14	7.1	52.6	2.04	4.16	5.3	1.5	9.8	234
杨志华	男	47	小脑梗死	否	是	G/A	G/G	C/C	*1/*2	中间代谢型	1	0.89	3.34	6.44	14	5.2	52.5	1.63	4.74	5.6	1.7	12	241
林世根	男	68	颈动脉狭窄否	否	否	G/G	G/G	C/C	*1/*1	快代谢型	0	0.92	2.02	5.05	9		52.4	1.11	3.73	5.6	1.2	10.3	206
余枫	男	53	脑梗死	否	是	G/A	G/A	C/C	*2/*3	慢代谢型	3	1.13	3.51	5.11	10	5.6	52.4	0.84	2.24	2.8	2.3	12.6	150
吴荣耀	男	55	脑梗死	否	是	G/A	G/G	C/C	*1/*2	中间代谢型	2	1.23	4.9	5.22	12	6	52.3	2.25	6.87	4.6	1.8	10.7	251
翁才刚	男	79	帕金森综合征	否	是	G/A	G/G	C/C	*1/*2	中间代谢型	1	0.97	1.5	4.71	15	5.7	51.1	0.66	2.62	3.1	0.9	9.5	132
唐训林	男	74	颈动脉狭窄	否	是	G/G	G/G	C/C	*1/*1	快代谢型	1	0.94	3.74	3.65	8		50.9	1.5	5.25	5.1	1.6	11.1	207
许菊梅	女	77	2型糖尿病	是	否	G/A	G/G	C/C	*1/*2	中间代谢型	1	1.19	4.18	6.41	10	9.6	50.8	1.79	5.8	4.7	1.4	10.7	303
陈吉涛	男	67	短暂性大脑缺血性发作	否	否	G/A	G/G	C/C	*1/*2	中间代谢型	2	1.35	2.89	4.63	11	5.1	50.8	0.88	4.01	3.9	1.4	9.8	221
石永照	男	65	脑梗死	是	是	A/A	G/G	C/C	*2/*2	慢代谢型	2	0.83	2.53	6.35	11	8.3	50.8	1.61	3.72	6.4	2.5	9.3	334
徐跃国	男	53	脑梗死	是	是	G/A	G/G	C/C	*1/*2	中间代谢型	0	0.79	3.15	10.19	16	7	50.8	1.49	4.46	3.7	2.2	10.3	206
葛银标	男	71	右侧多发脑梗死	否	是	G/A	G/G	C/C	*1/*2	中间代谢型	1	0.71	3.69	5.75	10	5.6	50.5	1.2	5.4	3.5	1.8	11.2	193
刘国军	男	48	脑梗死	否	是	A/A	G/G	C/C	*2/*2	慢代谢型	3	1.08	1.86	5.1	11		50.5	0.82	3.15	3.1	1.3	11.1	186
赵娟莲	女	53	颈内动脉狭窄	是	是	G/A	G/G	C/C	*1/*2	中间代谢型	0	0.81	2.33	6.09	9	6.8	50.2	1.82	3.49	3.5	3.9	10.8	274
王银叶	女	63	颈动脉狭窄	否	否	G/G	G/G	C/C	*1/*1	快代谢型	0	1.39	2.55	6.31	12	6.2	50.1	1.11	4.16	2.5	1.5	10.6	231
宋会保	男	57	脑梗死	否	否	G/A	G/G	C/C	*1/*2	中间代谢型	1	0.94	2.18	4.77			49.6	1.05	3.31	5.7	2.4	10	138
罗献忠	男	61	颈动脉狭窄脑梗死	是	否	G/G	G/G	C/C	*1/*1	快代谢型	0	1.16	3.08	5.89	9	6.3	49.3	1.06	4.47	4.3	1.8	9.7	251
王其家	男	71	脑梗死	是	是	G/A	G/G	C/C	*1/*2	中间代谢型	2	0.7	1.53	2.76		7.4	48.9	1.13	2.23	4.3	1.3	11.2	310
徐水生	男	64	脑血管意外	否	是	G/A	G/G	C/C	*1/*2	中间代谢型	0	0.95	3.2	4.58	8	5.9	48.9	1.41	4.62	4.5	1	10.7	320
汪信康	男	75	脑梗死	是	是	G/G	G/G	C/C	*1/*1	快代谢型	2	0.83	1.85	5.37	11	7.4	48.9	1.82	3.05	3	1.4	11.6	122
胡银科	男	50	主动脉夹层A型	否	是	G/A	G/G	C/C	*1/*2	中间代谢型	2	1.08	3.44	15.38	16	6.4	48.8	1.84	5.05	4.4	0.8	10.6	141
林力自	男	37	脑梗死	否	是	G/G	G/G	C/C	*1/*1	快代谢型	0	1.16	4.05	5.29		5.5	48.7	2.76	5.85	4.5	3.3	11.8	330
周安康	男	67	胃炎	否	否	G/G	G/G	C/C	*1/*1	快代谢型	0	0.94	2.32	5.61	14	6.8	48.7	1.07	6.8	2.2	1.1	11.6	174
桂岳文	男	75	脑梗死	否	是	G/A	G/G	C/C	*1/*2	中间代谢型	2				11	5.9	48.7	0.7	5.18	4.3	2.1	11.3	450
李百召	男	77	脑梗死	否	是	G/A	G/G	C/C	*1/*2	中间代谢型	2	1.04	2.24	4.62	10	5.6	48.5	0.6	3.45	11.2	1.7	11.1	210
陈咪玉	女	67	短暂性大脑缺血性发作	否	是	G/A	G/G	C/C	*1/*2	中间代谢型	0	1.03	2.58	4.31	16	5.9	48.5	1.12	3.95	1.8	0.3	9.3	228
林芬婷	女	67	脑动脉供血不足	否	是	G/G	G/A	C/C	*1/*3	中间代谢型	0	1.12	3.69	5.04	10	6.2	48.5	2.23	5.52	3.6	2.2	10.7	179
竺雪琴	女	59	脑梗死	否	是	G/A	G/G	C/C	*1/*2	中间代谢型	0	1.01	1.72	5.3	11	4.6	48.5	1.91	2.66	5.4	2.6	11	211
傅振飞	女	76	脑梗死	否	是	G/A	G/G	C/C	*1/*2	中间代谢型	2	1.45	2.61	4.59	6	6.1	48.5	0.57	4.19	4.2	1.7	10.9	200
葛丁威	男	39	肝功能不全	否	是	G/A	G/G	C/C	*1/*2	中间代谢型	0	1.1	3.56	5.66	7	5.7	48.5	3.76	4.93	5.2	1.6	11.6	156
林桂法	男	67	脑梗死	否	是	A/A	G/G	C/C	*2/*2	慢代谢型	2	0.72	2.09	5.83	13		48.5	1.26	3.22	4.5	1	10.1	234
张定方	男	60	脑梗死	否	否	G/G	G/G	C/C	*1/*1	快代谢型	1	1.06	4.06	4.58	16	5.4	48.5	1.97	5.89	1.8	0.5	10.4	203
杨秀山	女	65	脑干急性脑梗死	否	是	G/G	G/G	C/C	*1/*1	快代谢型	0	0.87	1.78	4.95	7	5.1	48.2	1.57	2.96	4.6	3.2	12	230
李安明	男	67	小脑梗死	否	是	G/G	G/G	C/C	*1/*1	快代谢型	0	0.78	1.66	10.2	10	9.4	47.6	1.65	2.67	6	1.9	11.2	193
何丙兴	男	50	脑梗死	是	是	G/A	G/G	C/C	*1/*2	中间代谢型	2	1.1	1.59	9.82	12	11.1	47.6	1.35	2.83	5	1.4	11.5	142
吕建章	男	65	脑梗死	否	是	G/A	G/A	C/C	*2/*3	慢代谢型	1	0.56	3.28	6.28		7.2	47.5	1.86	4.5	2	2.1	10	58
叶水洪	男	64	颈动脉狭窄	否	是	G/G	G/G	C/C	*1/*1	快代谢型	0	1.05	2.69	5.89		6.3	47.3	1.51	4.02	4	1.2	10	267
韩则鸣	男	73	消化道出血	否	是	G/G	G/A	C/C	*1/*3	中间代谢型	1	0.99	2.15	5.32	10	5.6	47.3	1.13	2.62	4	1.1	10.3	244
郑小东	男	42	脑梗死	否	是	G/A	G/G	C/C	*1/*2	中间代谢型	1	0.9	2.74	6.61	15	7	46.2	1.31	2.48	8.9	1.2	10.4	251
张凤彬	男	69	短暂性大脑缺血性发作	否	否	G/A	G/G	C/C	*1/*2	中间代谢型	2	0.74	2.34	5.91	11	6.6	45.5	1.6	3.39	6.2	1.4	10.9	98
姜春山	男	58	短暂性大脑缺血性发作	否	否	G/A	G/G	C/C	*1/*2	中间代谢型	1	0.97	4.3	5.05		5	44.9	3.05	6.81	3	1.6	10.1	197
杨美满	男	54	脑梗死	否	是	G/A	G/G	C/C	*1/*2	中间代谢型	1	0.96	3.18	4.28	12	5.9	44.7	1.86	4.74	7	1.3	10.4	264
李鸣	男	60	大脑动脉血栓形成引起的脑梗死	否	是	G/A	G/G	C/C	*1/*2	中间代谢型	2	1.46	4.07	7.01	8	5.1	44.7	1.46	6.02	6	2	11.7	205
柳辈文	男	77	多发性脑梗死	是	是	G/G	G/G	C/C	*1/*1	快代谢型	5	0.78	2.57	6.83	6	8.3	43.9	1.12	3.78	4.3	2.2	10.5	240
季阿牛	男	71	周围性面神经麻痹	否	是	A/A	G/G	C/C	*2/*2	慢代谢型	3	1.04	4.05	8.23	6	8.1	43.9	1.9	5.84	6	2.2	11.1	214
俞才振	男	80	双侧颈动脉狭窄	否	是	G/A	G/G	C/C	*1/*2	中间代谢型	1	1.53	2.47	5.49	12	6.6	43.5	0.99	4.33	4.5	1.4	9.8	196
田凤琴	女	55	脑梗死	否	是	G/A	G/G	C/C	*1/*2	中间代谢型	0	0.82	2.81	7.25	6	5.7	43.5	3.21	4.39	2.4	1.4	10.2	320
刘云德	男	75	右侧颈动脉狭窄重度狭窄	是	是	G/A	G/G	C/C	*1/*2	中间代谢型	1	1.31	2.37	6.23	6	6.6	43.3	1.3	4.5	4	1	11.1	203
忻海	男	60	脑动脉供血不足	否	是	G/A	G/G	C/C	*1/*2	中间代谢型	0	0.86	1.94	4.89	12	5.9	43.2	0.98	3	3.1	0.6	10	277
杜华聪	男	64	多发性脑梗死	是	否	G/G	G/G	C/C	*1/*1	快代谢型	1	0.78	2.04	5.27	9	7.6	43.1	1.31	3.18	5.6	1.8	10.4	153
吴琴素	女	76	脑梗死	否	是	G/G	G/G	C/C	*1/*1	快代谢型	5	1.1	3.19	4.54	8	6.3	42.5	2.58	4.88	3.9	2.2	10.8	245
王初桂	男	74	脑梗死	否	是	G/A	G/G	C/C	*1/*2	中间代谢型	0	1.48	2.39	4.31	11	5.5	41.8	1	4.14	5.8	1.1	8.7	191
何三瑾	男	67	急性脑梗死	否	是	G/G	G/G	C/C	*1/*1	快代谢型	0	1.11	1.8	6.98	7	6.2	41.6	0.98	3.05	4.1	0.9	9.4	211
徐维强	男	39	脑梗死	否	否	G/G	G/G	C/C	*1/*1	快代谢型	0	0.85	4.36	4.49	9	5.6	41.2	0.97	5.92	4	2	10.7	231
闻岳全	男	68	脑血管病	是	否	G/G	G/A	C/C	*1/*3	中间代谢型	2	1	3.67	5.52	10	6.6	41.1	1.09	5.11	5.4	2.2	10.6	219
徐丹丹	女	43	脑梗死	否	是	G/G	G/G	C/C	*1/*1	快代谢型	0	0.96	3.36	4.61	8	4.8	40.8	0.69	4.74	2.4	1.4	11.1	240
孙秋根	男	68	冠状动脉粥样硬化性心脏病	否	是	G/G	G/G	C/C	*1/*1	快代谢型	0	0.7	2.08	5.7	9		40.8	1.19	3.03	4.3	1.7	10.4	260
金仙梅	女	67	脑梗死	是	是	G/A	G/G	C/C	*1/*2	中间代谢型	2	1.22	4	6.92	8	8.5	40.8	2.03	5.77	7	1.3	11.4	263
严望亮	男	68	颈内动脉狭窄	否	否	G/G	G/G	C/C	*1/*1	快代谢型	0	0.93	2.42	4.91	6	6.2	40.8	1.61	3.62	3.6	1.9	9.2	229
张亚云	女	65	左侧脑桥急性脑梗死	是	是	G/A	G/G	C/C	*1/*2	中间代谢型	2	1.31	1.85	4.26	9	6.6	40.5	0.85	3.34	2.9	1.6	10.3	217
洪绵仁	男	45	脑梗死	否	否	G/G	G/G	C/C	*1/*1	快代谢型	1	0.77	3.32	8.31	11	9.2	40.5	1.38	4.62	4	1	11.1	210
范炳畅	男	52	脑梗死	否	是	G/A	G/G	C/C	*1/*2	中间代谢型	1	0.9	3.38	8.46	9	9.7	40.5	1.54	4.93	11.4	1.8	10.9	316
邹天麟	男	76	颈动脉狭窄	否	否	G/G	G/G	C/C	*1/*1	快代谢型	0	1.15	3.7	5.9	11	6.6	40.4	0.99	2.79	5.4	2	9.8	212
陈爱珍	女	62	短暂性大脑缺血性发作	否	是	G/A	G/G	C/C	*1/*2	中间代谢型	0	1.37	4.58	5.51	8	7.3	40.3	1.12	3.51	4	2.5	10.6	262
罗菊芬	女	70	脑梗死	是	是	G/A	G/G	C/C	*1/*2	中间代谢型	3	1.04	3.29	5.9	11	6.2	40.2	1.12	4.64	2.9	1.6	10	322
应善苗	男	62	左侧急性多发性脑梗死	是	是	G/G	G/G	C/C	*1/*1	快代谢型	0	0.89	3.38	7.22	13		39.9	1.07	4.62	4.1	0.7	8.5	293
陈友助	男	72	言语障碍	否	否	A/A	G/G	C/C	*2/*2	慢代谢型	1	0.98	2.39	4.09	11	5.7	39.9	0.8	3.28	5.2	1.9	11.1	170
冯国土	男	75	颈内动脉狭窄	否	否	G/A	G/G	C/C	*1/*2	中间代谢型	1	1.38	3.03	4.56	7	5.6	39.9	0.71	3.65	2.8	0.5	10	163
严水琴	女	69	脑梗死	是	是	G/G	G/G	C/C	*1/*1	快代谢型	0	1.43	4.06	10.78	10	9.4	39.8	1.96	6.2	8.7	1.2	9.7	249
邹强	男	44	后循环脑梗死	否	否	G/A	G/G	C/C	*1/*2	中间代谢型	3	1.35	2.95	7.76	10	10.6	39.7	1.38	3.11	5.2	0.7	12.1	83
张安平	男	60	脑梗死	否	否	G/A	G/A	C/C	*2/*3	慢代谢型	2	1.19	4.54	5.31		5.8	39.3	2.1	6.27	3.2	1.6	9.5	207
陈胜德	男	64	大面积脑梗死	是	是	G/G	G/G	C/C	*1/*1	快代谢型	0	0.71	1.76	6.34	10	6.6	39.2	1.2	4.6	10.2	1.3	12.4	289
金贵莲	女	76	脑梗死	否	是	G/G	G/G	C/C	*1/*1	快代谢型	5	1.72	4.41	5.95	7	5.5	38.6	0.75	7.06	3.1	0.8	11.1	204
王月琴	女	72	脑梗死	否	是	G/G	G/G	C/C	*1/*1	快代谢型	2	1.38	3.06	5.4	10	5.2	38.5	4.25	5.4	2.5	2.8	10.6	277
熊友传	男	54	脑梗死	是	是	G/G	G/G	C/C	*1/*1	快代谢型	0	1.09	2.81	4.83		7.1	38.1	1.97	4.3	9.5	1.8	10	300
高国振	男	57	脑梗死	是	是	G/G	G/G	C/C	*1/*1	快代谢型	1	0.84	2.08	3.37	13	7.6	37.8	0.76	3.18	5.4	1.8	10.1	260
李秀芝	女	57	多发性脑梗死	否	是	G/A	G/G	C/C	*1/*2	中间代谢型	4	1.26	2.24	4.36	9	6.8	37.5	0.83	3.73	8.7	0.7	10.9	255
包菊利	女	76	高血压	是	是	G/A	G/G	C/T	*2/*17	中间代谢型	1	1.05	3.61	5.1	13	7.2	36.6	1.13	5.36	7.2	3.2	9.8	300
刘开前	男	60	脑梗死	否	是	A/A	G/G	C/C	*2/*2	慢代谢型	1	0.86	3.21	5.3	9	4.5	36.4	2.87	4.83	3.3	1.8	10.7	197
严荣明	男	65	脑梗死	否	是	G/G	G/G	C/C	*1/*1	快代谢型	0	1.09	2.61	4.76	8	4	36	1.4	4.3	4.6	1.7	10	199
李正齐	男	52	脑梗死	否	是	G/G	G/G	C/C	*1/*1	快代谢型	0					5	33.7	2.32	4.37	5.4	1.8	12.3	209
林惠章	男	75	脑梗死	否	是	G/A	G/G	C/C	*1/*2	中间代谢型	2	0.72	3.09	4.93		5.4	32.8	1.3	4.62	3.2	1.1	11.3	137
沙明飞	男	67	脑梗死	否	是	G/G	G/G	C/C	*1/*1	快代谢型	0	1.85	3.15	4.94	8	5.3	32.7	0.57	5.06	3	1.8	11.7	206
柴森	男	38	脑梗	是	是	G/A	G/G	C/C	*1/*2	中间代谢型	2	0.7	2.17	8.29	17	10.9	32.6	2.35	3.23	5.5	1.7	11.4	271
周如良	男	82	椎动脉狭窄	否	是	G/G	G/G	C/C	*1/*1	快代谢型	1	1.13	2.14	4.82	9	5.8	32.4	1.2	3.63	1.9	2.2	10.9	152
陈根莲	女	65	右侧脑桥急性脑梗死	是	否	A/A	G/G	C/C	*2/*2	慢代谢型	4	1.24	2.93	7.6	13		32.3	2.08	4.64	4.8	1.9	11.9	228
郑能飞	女	57	短暂性大脑缺血性发作	否	是	G/G	G/G	C/C	*1/*1	快代谢型	0	1.28	2.06	4.83	7	5.2	32.2	0.7	3.46	4.4	1.4	11.8	202
李珠定	男	71	急性大面积脑梗死	否	是	G/A	G/G	C/C	*1/*2	中间代谢型	5	1.35	3.98	5.36		5.5	31.9	3.93	5.88	4.4	1.6	9.7	388
李永定	男	60	脑梗死	否	是	A/A	G/G	C/C	*2/*2	慢代谢型	0	0.94	1.38	4.23	8	5.6	31.1	1.1	2.4	3.5	1.8	11.1	189
翁承道	男	67	左侧中重度颈内动脉狭窄	否	是	G/G	G/G	C/C	*1/*1	快代谢型	0	0.8	2.58	4.8		4.9	31.1	2.16	3.96	3.2	0.7	10	185
陈春夫	男	74	冠状动脉粥样硬化性心脏病	否	是	G/G	G/G	C/C	*1/*1	快代谢型	0	1.22	4.77	6.39	7	6.1	30.7	2.47	6.72	11.6	1.2	12.5	153
陈圣昌	男	75	脑梗死	否	否	G/A	G/G	C/C	*1/*2	中间代谢型	1				12		30.6	1.2	4.3	5.8	0.5	10.7	102
王妙英	女	86	右侧急性脑梗死	否	是	G/G	G/G	C/C	*1/*1	快代谢型	0	1.26	2.43	4.63		5.2	30.5	1.99	4.08	4.1	1	10.7	157
陈芳珠	女	61	脑梗死	否	否	G/G	G/G	C/C	*1/*1	快代谢型	1	0.72	2.36	4.94	9	4.7	30.5	4.2	3.67	6.7	1.6	9.5	260
竺维琴	女	61	短暂性大脑缺血性发作	否	否	G/G	G/G	C/C	*1/*1	快代谢型	1	1.03	1.67	5.75	16	5.4	30.2	1.28	2.88	2.7	1.4	11.8	196
程发球	男	60	脑梗死	否	是	G/A	G/G	C/C	*1/*2	中间代谢型	4	1.03	1.98	4.76	7	5.5	30	1.12	4.09	3.4	2	11	266
何文明	男	68	脑梗死	否	是	G/G	G/G	C/C	*1/*1	快代谢型	4	0.65	2.9	4.88	11	5.2	29.8	1.66	4.05	4.3	1.6	10.6	240
陈真学	男	62	脑梗死	否	否	G/G	G/G	C/C	*1/*1	快代谢型	1	1.03	2.37	11.17	8	8.9	29.1	0.97	3.81	5.6	2.3	10.5	278
邱菊美	女	79	心力衰竭	是	否	G/G	G/G	C/C	*1/*1	快代谢型	0	0.65	2.37	6.04	8	7.8	28.7	1.03	3.38	5.8	1.5	9.9	195
张秀荣	女	60	脑梗死	否	否	G/G	G/G	C/C	*1/*1	快代谢型	0	1.17	4.38	7.12	8	7.2	28.7	1.33	4.83	3.3	1.3	8.7	221
俞荷芳	女	70	基底动脉狭窄	否	是	G/G	G/G	C/C	*1/*1	快代谢型	1	0.91	3	6.36	7	6.6	28.5	2.02	4.51	2.1	0.5	11.2	244
周惠娥	女	66	脑梗死	否	是	G/G	G/G	C/C	*1/*1	快代谢型	3	1.24	4.68	4.63	9	5.7	28.5	2.21	6.86	5.9	1.9	10.6	280
唐仙娥	女	49	大脑中动脉狭窄	否	否	G/G	G/G	C/C	*1/*1	快代谢型	0	1	2.7	4.63	8	5.7	28.3	0.4	2.82	3.9	1.5	10.3	260
张永昌	男	80	脑梗死	否	是	G/G	G/G	C/C	*1/*1	快代谢型	1	1.09	1.62	4.77	16.6	5.3	28.2	0.4	2.84	2.6	1.3	11.2	310
王亚珍	女	59	下肢动脉硬化闭塞症	是	是	G/G	G/G	C/C	*1/*1	快代谢型	0	1.46	4.33	5.27	6	6	28	1.18	5.3	7.1	2.7	9.8	362
郑国庆	男	52	脑梗死	否	是	G/G	G/G	C/C	*1/*1	快代谢型	0	0.85	2.43	4.71	10	5.8	27.8	1.25	3.68	7.3	1.1	10	477
王象水	男	79	下肢动脉硬化闭塞症	否	是	G/G	G/G	C/C	*1/*1	快代谢型	0	1.02	1.53	4.69	8	4	27.6	0.61	2.58	5.2	1.2	9.6	264
叶亦进	男	69	脑梗死	是	是	A/A	G/G	C/C	*2/*2	慢代谢型	1	1.02	1.53	4.69	13	7.3	27.5	1.62	4.18	4.3	0.8	11.2	146
卢明燕	男	52	脑梗死	否	是	G/A	G/G	C/C	*1/*2	中间代谢型	4	0.86	2.88	6.21	12	6	27.4	2.01	3.43	6.7	2	9	268
周金标	男	45	脑梗死	否	是	G/G	G/G	C/C	*1/*1	快代谢型	0	0.86	3.1	4.65	7	5.1	27.2	2.7	4.58	4.4	1.6	10.8	350
王丽君	女	78	高血压3级	否	是	G/G	G/G	C/C	*1/*1	快代谢型	1	0.73	2.19	6.34	8	6	26.9	1.4	4.49	3.8	1.2	9.7	209
励贵良	男	58	脑梗死	否	是	G/G	G/G	C/C	*1/*1	快代谢型	1	0.87	3.68	4.6	10	5.5	26.6	1.82	5.39	4	3	11.5	183
陈文华	男	66	脑梗死	否	是	G/G	G/G	C/C	*1/*1	快代谢型	1	1	2.98	5.12	7	6.6	26.6	1.67	4.42	6.5	1.7	11.4	222
李杏琴	女	69	脑梗死	是	是	G/G	G/G	C/C	*1/*1	快代谢型	1	1.08	2.12	5.15	6	6.8	25.6	0.94	3.4	4.2	1.3	10	248
宋振东	男	41	脑梗死	否	否	G/A	G/G	C/C	*1/*2	中间代谢型	0	1.02	1.84	10.2	12	7.1	24.9	1.43	2.78	2.3	1.2	10.1	234
田康杰	男	69	脑梗死	否	是	G/G	G/G	C/C	*1/*1	快代谢型	0	0.89	3	5.07	9	4.2	24.4	1.21	2.7	4.4	2	10.4	222
王家顺	男	67	双侧颈动脉狭窄	否	否	G/G	G/A	C/C	*1/*3	中间代谢型	0	1.28	3.7	5.54	8	6	23.7	0.93	3.13	4	0.7	10.9	212
丁杰	男	25	脑血管病	否	否	G/G	G/G	C/C	*1/*1	快代谢型	0	0.78	3.18	5.97	7	5.3	22.5	3	4.57	5.3	2	9.2	296
杨忠翼	男	69	脑梗死	否	是	G/A	G/G	C/C	*1/*2	中间代谢型	1	1.09	3.23	6.94	11	5.3	22.3	1.48	3.22	5.8	1	9.8	266
王文勇	男	38	脑梗死	否	是	G/G	G/G	C/C	*1/*1	快代谢型	1	0.96	2.59	5.96	12.2	5.5	20.8	1.32	3.99	3.7	1.1	11.1	228
杨垂芳	男	48	左侧大脑中动脉闭塞和狭窄	否	否	G/G	G/G	C/C	*1/*1	快代谢型	0	0.66	2.21	5.42	7	7	20.6	1.26	2.25	3.8	2	11.3	161
毛乾宝	男	68	症状性癫痫[继发性癫痫]	否	是	G/G	G/G	C/C	*1/*1	快代谢型	0	1.19	3.19	5.67	7	6.6	20	1.26	4.91	2.1	1.3	10.3	236
柳友平	女	73	脑动脉狭窄	否	是	G/A	G/G	C/C	*1/*2	中间代谢型	2	1.19	3.85	5.14	11.4	5.6	17.4	1.11	3.46	5.6	1	9.5	259
罗奶玉	男	84	胸痛待查	否	是	G/G	G/A	C/C	*1/*3	中间代谢型	1	0.92	3.05	5.8	11.2	6.6	16.2	1.44	4.69	4.1	1.7	9.9	297
奚芝兰	女	65	左侧脑梗死	否	是	G/G	G/G	C/C	*1/*1	快代谢型	1	1.11	1.83	5.8	7	6.5	16.1	1.16	3.17	3.15	1.4	11.2	130
赵芬琴	女	89	脑梗死	否	是	G/G	G/G	C/C	*1/*1	快代谢型	5	0.81	1.63	4.99	7.3	5.6	15.5	0.73	2.57	2.5	1	9.8	178
陆文军	男	61	大脑中动脉狭窄	否	否	G/G	G/G	C/C	*1/*1	快代谢型	1	0.82	1.37	5.83	9.1	6.6	14.4	1.01	2.65	3.9	1.5	10.5	221
陆文军	男	61	大脑中动脉狭窄	否	否	G/G	G/G	C/C	*1/*1	快代谢型	0	0.82	1.37	5.83	9.1	6.6	14.4	1.01	2.65	3.9	1.5	10.5	221
舒汶	男	52	锁骨下动脉狭窄	否	否	G/G	G/G	C/C	*1/*1	快代谢型	0	1.11	1.85	4.71	10	4	12.4	0.78	3.12	2.4	1.7	10.6	214
田茂爱	男	52	脑梗死	否	是	G/A	G/G	C/C	*1/*2	中间代谢型	1	1.12	2.23	4.73	12	4	10.4	0.98	3.5	3	1.7	9.9	179
梁广	男	36	脑梗死	否	否	A/A	G/G	C/C	*2/*2	慢代谢型	2	1.15	2.35	5.56	11	4.8	6.5	1.62	3.76	8.7	2.1	10	228
徐正丰	男	70	颈内动脉狭窄(虹吸段,右侧伴重度狭窄)	否	否	G/G	G/G	C/C	*1/*1	快代谢型	0	1.2	1.6	4.8	9.2	5.8	5.5	0.89	4.54	3.9	1.5	10.7	210
王柏益	男	65	颈动脉狭窄	是	是	G/G	G/G	C/C	*1/*1	快代谢型	0	1.26	1.77	4.75	9	7.2	1.7	0.42	3.03	5.6	1.6	8.8	263
张持平	男	69	脑梗死	否	否	G/G	G/G	C/C	*1/*1	快代谢型	1	0.85	2.12	4.72	8	6.1	1.27	4.83	7	4.6	1.8	11.2	266
戴金银	男	72	脑梗死	否	是	G/A	G/G	C/C	*1/*2	中间代谢型	2	0.53		7.23	12	6.1	0.5	0.82	3.21	9.7	0.9	11.3	133

## Sheet: logistic新增模板
性别	年龄	二型糖尿病	高血压	基因型	血栓风险评分表	HDL	LDL	GLU	同型半胱	糖化	ADP末次结果	甘油三酯	胆固醇	中性粒细胞绝对值	淋巴细胞绝对值	中淋比值	血小板平均体积	血小板	血小板体积与数量比值
1	1	0	1	0	5	0.81	1.63	4.99	7	5.6	15.5	0.73	2.57	2.5	1	2.5	9.8	178	0.0550562
1	1	0	1	0	0	1.26	2.43	4.63	6	5.2	30.5	1.99	4.08	4.1	1	4.1	10.7	157	0.0681529
0	1	0	1	1	1	0.92	3.05	5.8	12	6.6	16.2	1.44	4.69	4.1	1.7	2.41176	9.9	297	0.0333333
0	1	0	1	0	1	1.13	2.14	4.82	8.9	5.8	32.4	1.2	3.63	1.9	2.2	0.863636	10.9	152	0.0717105
1	1	0	0	2	2	1.25	2.15	4.84	12		60.6	1.09	3.6	3.8	1.2	3.16667	10	277	0.0361011
0	1	0	1	1	1	1.53	2.47	5.49	11	6.6	43.5	0.99	4.33	4.5	1.4	3.21429	9.8	196	0.05
0	1	0	1	0	1	1.09	1.62	4.77	11	5.3	28.2	0.4	2.84	2.6	1.3	2	11.2	310	0.036129
0	1	0	1	0	2	1.41	3.57	4.35	12	6.1	83.7	1.18	5.48	3.1	0.9	3.44444	10.8	136	0.0794118
0	1	0	0	0	5	1.45	3.44	6.05	8	6.5	66.3	0.84	3.78	4.3	1.3	3.30769	11.7	230	0.0508696
0	1	0	1	1	1	0.97	1.5	4.71		5.7	51.1	0.66	2.62	3.1	0.9	3.44444	9.5	132	0.0719697
1	1	1	0	0	0	0.65	2.37	6.04	8	7.8	28.7	1.03	3.38	5.8	1.5	3.86667	9.9	195	0.0507692
0	1	0	1	0	0	1.02	1.53	4.69	13	4	27.6	0.61	2.58	5.2	1.2	4.33333	9.6	264	0.0363636
0	1	0	1	1	0	0.84	1.87	4.74	13.9	6.7	61.2	0.92	2.98	3.7	1.4	2.64286	10.2	349	0.0292264
0	1	0	1	1	2	0.75	1.81	7.31	19	6.6	57.9	1.36	4.97	4	1.5	2.66667	9.5	277	0.034296
1	1	0	1	0	1	0.73	2.19	6.34	16	6	26.9	1.4	4.49	3.8	1.2	3.16667	9.7	209	0.0464115
1	1	1	0	1	1	1.19	4.18	6.41	11	9.6	50.8	1.79	5.8	4.7	1.4	3.35714	10.7	303	0.0353135
0	1	0	1	1	2	1.04	2.24	4.62		5.6	48.5	0.6	3.45	11.2	1.7	6.58824	11.1	210	0.0528571
0	1	1	1	0	5	0.78	2.57	6.83	16	8.3	43.9	1.12	3.78	4.3	2.2	1.95455	10.5	240	0.04375
0	1	0	0	2	1	0.95	2.07	4.53	9	5.2	62.5	0.94	3.44	4.66	1.4	3.32857	10.6	157	0.0675159
1	1	0	1	1	2	1.45	2.61	4.59	6	6.1	48.5	0.57	4.19	4.2	1.7	2.47059	10.9	200	0.0545
1	1	0	1	0	5	1.1	3.19	4.54	11	6.3	42.5	2.58	4.88	3.9	2.2	1.77273	10.8	245	0.0440816
0	1	0	0	0	0	1.15	3.7	5.9	11	6.6	40.4	0.99	2.79	5.4	2	2.7	9.8	212	0.0462264
1	1	0	1	0	5	1.72	4.41	5.95		5.5	38.6	0.75	7.06	3.1	0.8	3.875	11.1	204	0.0544118
1	1	1	1	2	1	1.05	3.61	5.1	49	7.2	36.6	1.13	5.36	7.2	3.2	2.25	9.8	300	0.0326667
1	1	0	1	2	1	0.93	2.84	5.03	6	5.4	72.5	2.9	5.4	2.7	1.2	2.25	10.8	182	0.0593407
1	1	1	1	1	2	0.86	2.85	8.01	12	9.1	66.6	1.49	4.01	3	2	1.5	11.3	228	0.0495614
0	1	0	1	0	2	1.29	3.42	4.78		5.7	63.7	1.19	5.47	3.7	2.3	1.6087	11.9	224	0.053125
0	1	0	0	2	2	1.36	1.82	4.29	7	6	62.3	0.61	3.48	3.5	1.4	2.5	11.2	205	0.0546341
0	1	0	1	1	4				14		61.1	1.1	3.2	3.1	1.1	2.81818	9.7	225	0.0431111
0	1	1	1	0	2	0.83	1.85	5.37	11	7.4	48.9	1.82	3.05	3	1.4	2.14286	11.6	122	0.095082
0	1	0	1	1	2				9	5.9	48.7	0.7	5.18	4.3	2.1	2.04762	11.3	450	0.0251111
0	1	1	1	1	1	1.31	2.37	6.23	6	6.6	43.3	1.3	4.5	4	1	4	11.1	203	0.0546798
0	1	0	0	1	1	1.38	3.03	4.56	16	5.6	39.9	0.71	3.65	2.8	0.5	5.6	10	163	0.0613497
0	1	0	1	1	2	0.72	3.09	4.93	13	5.4	32.8	1.3	4.62	3.2	1.1	2.90909	11.3	137	0.0824818
0	1	0	0	1	1				11		30.6	1.2	4.3	5.8	0.5	11.6	10.7	102	0.104902
0	1	1	1	1	1	0.98	1.34	7.81	14	7	71.1	0.52	2.33	4.2	1.1	3.81818	10.5	162	0.0648148
1	1	0	1	2	2	0.65	3	4.24	12	8.1	66.8	3.14	4.34	5.3	1.4	3.78571	10.7	222	0.0481982
0	1	1	1	1	1				11		60.6	1.3	5.7	8.4	0.9	9.33333	11.9	138	0.0862319
0	1	0	1	1	5	0.79	2.6	4.56	9		60.5	0.89	3.81	4	1.7	2.35294	9.6	192	0.05
0	1	0	0	0	2	1.41	2.41	4.26		5.3	56.8	0.99	4.07	7.6	1.2	6.33333	10.9	201	0.0542289
0	1	0	1	0	1	0.94	3.74	3.65	13		50.9	1.5	5.25	5.1	1.6	3.1875	11.1	207	0.0536232
0	1	0	1	1	0	1.48	2.39	4.31	15	5.5	41.8	1	4.14	5.8	1.1	5.27273	8.7	191	0.0455497
0	1	0	1	0	0	1.22	4.77	6.39		6.1	30.7	2.47	6.72	11.6	1.2	9.66667	12.5	153	0.0816993
0	1	0	0	1	1	1.28	1.75	4.38	12	5.2	68.5	0.64	3.05	3.4	1.1	3.09091	10.8	163	0.0662577
0	1	0	1	2	2	0.97	2.63	5.49		6.4	66.5	0.97	3.91	3.7	1.4	2.64286	10.7	214	0.05
0	1	0	1	2	2	1.22	3.99	6.48	12	5.9	57.8	1.67	6.25	3.5	1.3	2.69231	11.4	202	0.0564356
0	1	0	1	1	1	0.99	2.15	5.32	11	5.6	47.3	1.13	2.62	4	1.1	3.63636	10.3	244	0.0422131
1	1	0	1	1	2	1.19	3.85	5.14		5.6	17.4	1.11	3.46	5.6	1	5.6	9.5	259	0.0366795
0	1	0	0	1	2	0.87	2.16	4.13	20	5.8	70.2	0.83	3.36	5.6	1.7	3.29412	10.6	430	0.0246512
0	1	0	0	2	1	1.48	3.05	2.77	13	5.3	61.8	1.25	4.81	8.5	0.4	21.25	10.4	211	0.0492891
0	1	0	0	2	1	0.98	2.39	4.09		5.7	39.9	0.8	3.28	5.2	1.9	2.73684	11.1	170	0.0652941
1	1	0	1	0	2	1.38	3.06	5.4	14	5.2	38.5	4.25	5.4	2.5	2.8	0.892857	10.6	277	0.0382671
0	1	0	1	1	2	0.53		7.23		6.1	0.5	0.82	3.21	9.7	0.9	10.7778	11.3	133	0.0849624
1	1	1	1	1	1	1.12	4.19	9.8	14	8.4	63.4	1.29	5.99	2.3	3	0.766667	12.6	148	0.0851351
0	1	0	1	1	1	0.71	3.69	5.75		5.6	50.5	1.2	5.4	3.5	1.8	1.94444	11.2	193	0.0580311
0	1	1	1	1	2	0.7	1.53	2.76	16	7.4	48.9	1.13	2.23	4.3	1.3	3.30769	11.2	310	0.036129
0	1	0	1	2	3	1.04	4.05	8.23	14	8.1	43.9	1.9	5.84	6	2.2	2.72727	11.1	214	0.0518692
0	1	0	1	1	5	1.35	3.98	5.36	9	5.5	31.9	3.93	5.88	4.4	1.6	2.75	9.7	388	0.025
0	1	1	1	2	2	0.91	1.68	5.83	14	5.6	70.8	2.1	6.8	5.9	2.2	2.68182	10.1	332	0.0304217
0	1	0	0	1	1	1.19	3.01	4.54	14		59.4	1.16	4.46	4	1.3	3.07692	10.4	270	0.0385185
1	1	1	1	1	3	1.04	3.29	5.9	13	6.2	40.2	1.12	4.64	2.9	1.6	1.8125	10	322	0.0310559
1	1	0	1	0	1	0.91	3	6.36	10	6.6	28.5	2.02	4.51	2.1	0.5	4.2	11.2	244	0.0459016
0	1	0	0	0	0	1.2	1.6	4.8	9	5.8	5.5	0.89	4.54	3.9	1.5	2.6	10.7	210	0.0509524
0	1	0	1	0	0	1.15	3.99	4.9	12	5.4	89.2	0.87	2.51	7.3	0.9	8.11111	10.7	258	0.0414729
0	1	0	1	1	5	0.58	2.3	3.9	14	5.6	58.5	1.68	3.35	7.9	1.7	4.64706	10.8	325	0.0332308
0	1	0	0	1	2	0.74	2.34	5.91	13	6.6	45.5	1.6	3.39	6.2	1.4	4.42857	10.9	98	0.111224
1	1	1	1	0	0	1.43	4.06	10.78	7	9.4	39.8	1.96	6.2	8.7	1.2	7.25	9.7	249	0.0389558
0	1	1	1	2	1	1.02	1.53	4.69	10	7.3	27.5	1.62	4.18	4.3	0.8	5.375	11.2	146	0.0767123
1	1	1	1	0	1	1.08	2.12	5.15	10	6.8	25.6	0.94	3.4	4.2	1.3	3.23077	10	248	0.0403226
0	1	0	1	0	0	0.89	3	5.07		4.2	24.4	1.21	2.7	4.4	2	2.2	10.4	222	0.0468468
0	1	0	1	1	1	1.09	3.23	6.94	15	5.3	22.3	1.48	3.22	5.8	1	5.8	9.8	266	0.0368421
0	1	0	0	0	1	0.85	2.12	4.72	9	6.1	1.27	4.83	7	4.6	1.8	2.55556	11.2	266	0.0421053
0	1	0	1	2	1	0.95	1.6	6.32	11	6.6	66.6	0.89	2.65	3.6	1.9	1.89474	10.6	207	0.0512077
0	1	0	0	0	0	0.92	2.02	5.05	14		52.4	1.11	3.73	5.6	1.2	4.66667	10.3	206	0.05
0	1	1	0	1	2	1	3.67	5.52	9	6.6	41.1	1.09	5.11	5.4	2.2	2.45455	10.6	219	0.0484018
0	1	0	1	0	0	0.7	2.08	5.7	11		40.8	1.19	3.03	4.3	1.7	2.52941	10.4	260	0.04
0	1	0	0	0	0	0.93	2.42	4.91	14	6.2	40.8	1.61	3.62	3.6	1.9	1.89474	9.2	229	0.0401747
0	1	0	1	0	4	0.65	2.9	4.88	9	5.2	29.8	1.66	4.05	4.3	1.6	2.6875	10.6	240	0.0441667
0	1	0	1	0	0	1.19	3.19	5.67	12	6.6	20	1.26	4.91	2.1	1.3	1.61538	10.3	236	0.0436441
1	1	1	0	1	1	1.77	3.25	6.97	14	6.9	60.8	0.86	4.61	3.7	2.5	1.48	10	307	0.0325733
1	1	0	0	1	2	1.36	3.1	5.81	14	5.6	58.5	1.36	7.75	1.3	1.4	0.928571	10.4	212	0.0490566
0	1	0	1	1	1	0.83	3.28	5.58	9	5.7	58.2	2.43	4.75	7.8	2.1	3.71429	10.9	188	0.0579787
0	1	0	1	1	0	0.78	2.31	4.1	10	6.6	52.8	1.07	3.31	3.1	1.2	2.58333	8.9	242	0.0367769
0	1	0	0	1	2	1.35	2.89	4.63	12	5.1	50.8	0.88	4.01	3.9	1.4	2.78571	9.8	221	0.0443439
0	1	0	0	0	0	0.94	2.32	5.61	15	6.8	48.7	1.07	6.8	2.2	1.1	2	11.6	174	0.0666667
1	1	0	1	1	0	1.03	2.58	4.31	8	5.9	48.5	1.12	3.95	1.8	0.3	6	9.3	228	0.0407895
1	1	0	1	1	0	1.12	3.69	5.04	10	6.2	48.5	2.23	5.52	3.6	2.2	1.63636	10.7	179	0.0597765
0	1	0	1	2	2	0.72	2.09	5.83	11		48.5	1.26	3.22	4.5	1	4.5	10.1	234	0.0431624
0	1	0	1	0	0	0.78	1.66	10.2	11	9.4	47.6	1.65	2.67	6	1.9	3.15789	11.2	193	0.0580311
0	1	0	1	0	0	1.11	1.8	6.98	16	6.2	41.6	0.98	3.05	4.1	0.9	4.55556	9.4	211	0.0445498
1	1	1	1	1	2	1.22	4	6.92	10	8.5	40.8	2.03	5.77	7	1.3	5.38462	11.4	263	0.043346
0	1	0	1	0	0	1.85	3.15	4.94	11	5.3	32.7	0.57	5.06	3	1.8	1.66667	11.7	206	0.0567961
0	1	0	1	0	0	0.8	2.58	4.8	9	4.9	31.1	2.16	3.96	3.2	0.7	4.57143	10	185	0.0540541
0	1	0	0	1	0	1.28	3.7	5.54	12	6	23.7	0.93	3.13	4	0.7	5.71429	10.9	212	0.0514151
0	1	1	1	0	0	0.84	2.2	7.1		11.2	74.3	1.24	3.3	4.4	1.4	3.14286	12.2	178	0.0685393
1	1	0	1	1	1	1.24	2.29	4.97	9	5.4	72.4	1.2	3.79	4.6	1.6	2.875	10.6	296	0.0358108
1	1	0	1	0	0	1.02	3.37	4.9		5.6	70.2	1.15	4.78	1.9	1.5	1.26667	10.4	191	0.0544503
1	1	0	0	1	0	1.36	4.19	5.53	8	6.2	67.8	1.37	6.9	8.8	1.3	6.76923	9.8	263	0.0372624
0	1	1	1	1	1	0.73	1.95	7.31	11	6	60.3	1.83	2.96	3.4	1.3	2.61538	11	210	0.052381
0	1	1	1	2	2	1.51	5.86	6.87	16	6.5	58	1.81	8.03	4.8	3.1	1.54839	12.4	188	0.0659574
0	1	1	1	1	0	1.02	2.91	7.88		7.3	54.2	1.32	4.3	7.6	1.4	5.42857	11.3	197	0.0573604
1	1	0	1	0	3	1.24	4.68	4.63	14	5.7	28.5	2.21	6.86	5.9	1.9	3.10526	10.6	280	0.0378571
0	1	0	1	0	1	1	2.98	5.12	11	6.6	26.6	1.67	4.42	6.5	1.7	3.82353	11.4	222	0.0513514
1	1	0	1	0	0				10	6.7	71.7	5.09	4.42	9.1	2.1	4.33333	10.1	336	0.0300595
1	1	0	1	1	1	1.08	2.26	7.78	16	6.9	60.5	1.21	3.68	2.8	1.7	1.64706	10.4	202	0.0514851
0	1	0	1	1	1	1.03	2.87	4.34	10		59.3	1.51	4.48	6.6	1.7	3.88235	12.1	298	0.040604
0	1	1	1	2	2	0.83	2.53	6.35	11	8.3	50.8	1.61	3.72	6.4	2.5	2.56	9.3	334	0.0278443
1	1	0	1	0	0	0.87	1.78	4.95	6	5.1	48.2	1.57	2.96	4.6	3.2	1.4375	12	230	0.0521739
0	1	0	1	2	1	0.56	3.28	6.28	7	7.2	47.5	1.86	4.5	2	2.1	0.952381	10	58	0.172414
1	1	1	1	1	2	1.31	1.85	4.26	13	6.6	40.5	0.85	3.34	2.9	1.6	1.8125	10.3	217	0.0474654
0	1	0	1	0	0	1.09	2.61	4.76	16	4	36	1.4	4.3	4.6	1.7	2.70588	10	199	0.0502513
1	1	1	0	2	4	1.24	2.93	7.6	7		32.3	2.08	4.64	4.8	1.9	2.52632	11.9	228	0.052193
1	1	0	1	0	1	1.11	1.83	5.8	10	6.5	16.1	1.16	3.17	3.15	1.4	2.25	11.2	130	0.0861538
0	1	1	1	0	0	1.26	1.77	4.75	12	7.2	1.7	0.42	3.03	5.6	1.6	3.5	8.8	263	0.0334601
0	0	0	0	2	0	0.89	2.47	4.32		5.3	62.5	1.31	3.81	4.2	1.7	2.47059	9.5	232	0.0409483
0	0	0	1	1	0	0.95	3.2	4.58		5.9	48.9	1.41	4.62	4.5	1	4.5	10.7	320	0.0334375
0	0	0	1	0	0	1.05	2.69	5.89	10	6.3	47.3	1.51	4.02	4	1.2	3.33333	10	267	0.0374532
0	0	1	0	0	1	0.78	2.04	5.27	15	7.6	43.1	1.31	3.18	5.6	1.8	3.11111	10.4	153	0.0679739
0	0	1	1	0	0	0.71	1.76	6.34	11	6.6	39.2	1.2	4.6	10.2	1.3	7.84615	12.4	289	0.0429066
0	0	0	1	1	0	0.87	1.73	7.39		7.9	72.8	1.06	2.82	6.1	1.7	3.58824	11.4	250	0.0456
0	0	0	1	0	1	0.75	1.73	8.66	12	8.5	68.1	2.05	2.78	3.7	0.9	4.11111	11.7	169	0.0692308
0	0	0	1	1	1	0.82	3.12	4.31	8	6.2	62	1.67	3.24	2.8	1.3	2.15385	11	197	0.0558376
1	0	1	0	1	0	1.35	2.17	6.68	6	8.4	60.4	1.25	3.96	2.5	2.1	1.19048	10.4	206	0.0504854
0	0	1	1	1	0	0.98	3.03	6.74	6	6.8	59.7	1.64	4.48	7.8	1.7	4.58824	10.9	221	0.0493213
1	0	0	1	0	0	1.12	3.55	4.55	12	5.3	52.8	1.58	5.25	4.2	1.6	2.625	11.1	240	0.04625
1	0	0	0	0	0	1.39	2.55	6.31	6	6.2	50.1	1.11	4.16	2.5	1.5	1.66667	10.6	231	0.0458874
0	0	0	1	1	1	0.86	2.98	4.73	6	5.3	64.6	1.2	4.17	9	1	9	10	180	0.0555556
1	0	1	1	1	1	0.89	2.48	8.37	12	10.3	52.8	1.31	3.64	4.5	1.3	3.46154	10.8	280	0.0385714
1	0	0	1	1	0	1.37	4.58	5.51	9	7.3	40.3	1.12	3.51	4	2.5	1.6	10.6	262	0.040458
0	0	1	1	0	0	0.89	3.38	7.22	8		39.9	1.07	4.62	4.1	0.7	5.85714	8.5	293	0.0290102
0	0	0	0	0	1	1.03	2.37	11.17	11	8.9	29.1	0.97	3.81	5.6	2.3	2.43478	10.5	278	0.0377698
0	0	0	0	2	3	1.11	4.48	5.94	7	6	79.3	2.06	6.08	6.3	3.5	1.8	12.4	126	0.0984127
0	0	0	0	0	0	0.96	3.43	4.29	9	5.4	71.4	1.09	4.88	3.4	1.4	2.42857	10.8	202	0.0534653
0	0	0	1	0	1	1	3.64	5.2	10	5.6	68.3	1.09	5.02	4.8	1.8	2.66667	9.1	196	0.0464286
1	0	1	1	1	2				8		62	1.3	5.66	6.6	1.8	3.66667	11.6	253	0.0458498
1	0	1	1	2	0	1.28	4.51	6.13	9	7.1	52.6	2.04	4.16	5.3	1.5	3.53333	9.8	234	0.0418803
0	0	1	0	0	0	1.16	3.08	5.89	8	6.3	49.3	1.06	4.47	4.3	1.8	2.38889	9.7	251	0.0386454
1	0	0	0	0	1	0.72	2.36	4.94	6	4.7	30.5	4.2	3.67	6.7	1.6	4.1875	9.5	260	0.0365385
1	0	0	0	0	1	1.03	1.67	5.75	9	5.4	30.2	1.28	2.88	2.7	1.4	1.92857	11.8	196	0.0602041
0	0	0	0	0	1	0.82	1.37	5.83	11	6.6	14.4	1.01	2.65	3.9	1.5	2.6	10.5	221	0.0475113
0	0	0	0	0	0	0.82	1.37	5.83	9	6.6	14.4	1.01	2.65	3.9	1.5	2.6	10.5	221	0.0475113
0	0	0	1	0	0	1.23	4.6	4.73	11	5.9	65.2	1.84	6.48	3.9	1.3	3	10.35	379	0.0273087
0	0	1	1	1	1	1.06	2.89	7.42	8	7	52.8	3.24	4.5	4.8	2.9	1.65517	9.6	201	0.0477612
0	0	0	0	0	1	1.06	4.06	4.58	11	5.4	48.5	1.97	5.89	1.8	0.5	3.6	10.4	203	0.0512315
0	0	0	1	1	2	1.46	4.07	7.01	13	5.1	44.7	1.46	6.02	6	2	3	11.7	205	0.0570732
0	0	0	1	1	0	0.86	1.94	4.89	11	5.9	43.2	0.98	3	3.1	0.6	5.16667	10	277	0.0361011
0	0	0	0	2	2	1.19	4.54	5.31	7	5.8	39.3	2.1	6.27	3.2	1.6	2	9.5	207	0.0458937
0	0	0	1	2	1	0.86	3.21	5.3	10	4.5	36.4	2.87	4.83	3.3	1.8	1.83333	10.7	197	0.0543147
0	0	0	1	2	0	0.94	1.38	4.23	10	5.6	31.1	1.1	2.4	3.5	1.8	1.94444	11.1	189	0.0587302
0	0	0	1	1	4	1.03	1.98	4.76		5.5	30	1.12	4.09	3.4	2	1.7	11	266	0.0413534
1	0	0	0	0	0	1.17	4.38	7.12	10	7.2	28.7	1.33	4.83	3.3	1.3	2.53846	8.7	221	0.0393665
1	0	0	1	1	0	1.01	1.72	5.3	7	4.6	48.5	1.91	2.66	5.4	2.6	2.07692	11	211	0.0521327
1	0	1	1	0	0	1.46	4.33	5.27	10	6	28	1.18	5.3	7.1	2.7	2.62963	9.8	362	0.0270718
0	0	0	1	1	3	1.06	3.14	4.59		5.7	81.4	3.05	4.94	4.2	1.8	2.33333	10.1	310	0.0325806
1	0	0	1	2	1				13		69.5	1.78	5.88	4.6	2.6	1.76923	9.9	319	0.0310345
0	0	0	0	1	4	0.83	2.56	4.93	9	5	64.8	1.17	3.78	6.5	1.3	5	9.4	183	0.0513661
0	0	0	0	1	1	0.97	4.3	5.05	13	5	44.9	3.05	6.81	3	1.6	1.875	10.1	197	0.051269
0	0	0	1	0	1	0.87	3.68	4.6	9	5.5	26.6	1.82	5.39	4	3	1.33333	11.5	183	0.0628415
0	0	0	1	0	1	1.4	2.71	5.14	8		59	1.37	4.6	5.4	2.1	2.57143	10.9	236	0.0461864
0	0	0	0	1	1	0.94	2.18	4.77			49.6	1.05	3.31	5.7	2.4	2.375	10	138	0.0724638
0	0	1	1	0	1	0.84	2.08	3.37		7.6	37.8	0.76	3.18	5.4	1.8	3	10.1	260	0.0388462
1	0	0	1	1	4	1.26	2.24	4.36	8	6.8	37.5	0.83	3.73	8.7	0.7	12.4286	10.9	255	0.0427451
1	0	0	1	0	0	1.28	2.06	4.83	17	5.2	32.2	0.7	3.46	4.4	1.4	3.14286	11.8	202	0.0584158
1	0	0	1	1	2	1	3.34	6.37	9	5.3	74.7	1.6	4.54	2.6	1.3	2	11.2	154	0.0727273
0	0	0	1	1	2	1.47	2.66	4.53	13	5.1	56.8	1.08	4.4	8.2	1.4	5.85714	10.1	239	0.0422594
0	0	0	1	1	2	1.23	4.9	5.22	7	6	52.3	2.25	6.87	4.6	1.8	2.55556	10.7	251	0.0426295
1	0	0	1	1	0	0.82	2.81	7.25		5.7	43.5	3.21	4.39	2.4	1.4	1.71429	10.2	320	0.031875
1	0	0	0	1	1	0.83	3.82	4.54	8	5.1	62.2	1.15	5.28	4.3	1.7	2.52941	11.1	259	0.0428571
0	0	1	0	1	1	0.84	3.4	13.59		9.3	60.3	3.09	4.99	8.5	0.8	10.625	10.8	270	0.04
1	0	1	0	0	1	0.75	2.43	11.08	7	13.5	57.4	1.23	3.65	5.5	2.6	2.11538	10.6	273	0.0388278
0	0	0	1	1	1	0.96	3.18	4.28	12	5.9	44.7	1.86	4.74	7	1.3	5.38462	10.4	264	0.0393939
0	0	1	1	0	0	1.09	2.81	4.83		7.1	38.1	1.97	4.3	9.5	1.8	5.27778	10	300	0.0333333
0	0	0	1	1	0	0.84	3.12	4.28	9	4.6	68.8	0.62	4.96	4.8	0.8	6	10.1	334	0.0302395
0	0	0	1	1	0	0.92	1.74	5.38	16		58.9	1.13	2.9	2.3	1.6	1.4375	9.5	311	0.0305466
0	0	0	1	2	3	1.13	3.51	5.11	7	5.6	52.4	0.84	2.24	2.8	2.3	1.21739	12.6	150	0.084
0	0	1	1	1	0	0.79	3.15	10.19	11	7	50.8	1.49	4.46	3.7	2.2	1.68182	10.3	206	0.05
1	0	1	1	1	0	0.81	2.33	6.09	8	6.8	50.2	1.82	3.49	3.5	3.9	0.897436	10.8	274	0.0394161
0	0	0	0	1	1	0.84	1.59	4.67	8	5.2	52.8	0.96	2.6	2.6	1.3	2	10.6	123	0.0861789
0	0	0	1	1	1	0.9	3.38	8.46	8	9.7	40.5	1.54	4.93	11.4	1.8	6.33333	10.9	316	0.0344937
0	0	0	1	0	0				7	5	33.7	2.32	4.37	5.4	1.8	3	12.3	209	0.0588517
0	0	0	1	0	0	0.85	2.43	4.71	9	5.8	27.8	1.25	3.68	7.3	1.1	6.63636	10	477	0.0209644
0	0	0	1	1	4	0.86	2.88	6.21	8	6	27.4	2.01	3.43	6.7	2	3.35	9	268	0.0335821
0	0	0	0	0	0	1.11	1.85	4.71	16.6	4	12.4	0.78	3.12	2.4	1.7	1.41176	10.6	214	0.0495327
0	0	0	1	1	1	1.12	2.23	4.73	6	4	10.4	0.98	3.5	3	1.7	1.76471	9.9	179	0.0553073
0	0	1	0	1	0	0.73	4.44	7.7	10	7.9	64.3	1.11	3.95	4	2.1	1.90476	9.6	283	0.0339223
0	0	0	1	1	1	0.96	2.32	4.95	8		59.5	1.15	3.57	4.4	1.3	3.38462	12.1	220	0.055
0	0	0	1	1	2	1.08	3.44	15.38	13	6.4	48.8	1.84	5.05	4.4	0.8	5.5	10.6	141	0.0751773
0	0	1	1	1	2	1.1	1.59	9.82	12	11.1	47.6	1.35	2.83	5	1.4	3.57143	11.5	142	0.0809859
0	0	0	1	1	1	0.79	4.34	4.95	7	7.7	54.8	1.85	5.86	8	2.4	3.33333	10.9	320	0.0340625
1	0	0	0	0	0	1	2.7	4.63	8	5.7	28.3	0.4	2.82	3.9	1.5	2.6	10.3	260	0.0396154
0	0	0	0	1	1	0.79	3.49	5.27	10	5.6	62.8	1.64	4.73	4.1	1.9	2.15789	9.1	325	0.028
1	0	1	0	1	2	1.26	1.54	4.91	7		57.8	0.42	2.81	4	1.7	2.35294	11.1	169	0.0656805
0	0	0	1	2	3	1.08	1.86	5.1	6		50.5	0.82	3.15	3.1	1.3	2.38462	11.1	186	0.0596774
0	0	0	0	0	0	0.66	2.21	5.42	12	7	20.6	1.26	2.25	3.8	2	1.9	11.3	161	0.0701863
0	0	0	0	2	0	1.01	2.55	3.69	9	5.6	60.5	0.64	3.86	3.3	2.3	1.43478	11.7	179	0.0653631
0	0	1	0	0	0	0.66	3.33	11.81	8	12	52.8	1.41	4.55	5.6	2.3	2.43478	11.8	186	0.0634409
0	0	0	1	1	1	0.89	3.34	6.44	7	5.2	52.5	1.63	4.74	5.6	1.7	3.29412	12	241	0.0497925
0	0	0	1	1	1	1.05	3.12	5.57	11	5.4	60.5	2.96	4.84	4.1	2	2.05	8.6	274	0.0313869
0	0	1	0	1	1	1.29	2.18	4.31	12.2	5.8	53.8	1.42	7.32	3.1	1.4	2.21429	9.8	279	0.0351254
0	0	0	0	0	1	0.77	3.32	8.31	7	9.2	40.5	1.38	4.62	4	1	4	11.1	210	0.0528571
0	0	0	1	0	0	0.86	3.1	4.65	7	5.1	27.2	2.7	4.58	4.4	1.6	2.75	10.8	350	0.0308571
0	0	0	0	1	3	1.35	2.95	7.76	11.4	10.6	39.7	1.38	3.11	5.2	0.7	7.42857	12.1	83	0.145783
1	0	0	1	0	0	0.96	3.36	4.61	11.2	4.8	40.8	0.69	4.74	2.4	1.4	1.71429	11.1	240	0.04625
0	0	0	1	1	1	0.9	2.74	6.61	7	7	46.2	1.31	2.48	8.9	1.2	7.41667	10.4	251	0.0414343
0	0	0	0	1	0	1.02	1.84	10.2	7.3	7.1	24.9	1.43	2.78	2.3	1.2	1.91667	10.1	234	0.0431624
0	0	0	0	1	1				9.1		55.6	1.2	5.4	5.4	1.1	4.90909	11	239	0.0460251
0	0	0	1	1	0	1.1	3.56	5.66	9.1	5.7	48.5	3.76	4.93	5.2	1.6	3.25	11.6	156	0.074359
0	0	0	0	0	0	0.85	4.36	4.49	10	5.6	41.2	0.97	5.92	4	2	2	10.7	231	0.0463203
0	0	1	1	1	2	0.7	2.17	8.29	12	10.9	32.6	2.35	3.23	5.5	1.7	3.23529	11.4	271	0.0420664
0	0	0	1	0	1	0.96	2.59	5.96	11	5.5	20.8	1.32	3.99	3.7	1.1	3.36364	11.1	228	0.0486842
0	0	0	1	0	0	1.16	4.05	5.29	9.2	5.5	48.7	2.76	5.85	4.5	3.3	1.36364	11.8	330	0.0357576
0	0	0	0	2	2	1.15	2.35	5.56	9	4.8	6.5	1.62	3.76	8.7	2.1	4.14286	10	228	0.0438596
0	0	0	0	0	0	0.78	3.18	5.97	8	5.3	22.5	3	4.57	5.3	2	2.65	9.2	296	0.0310811
0	0	0	0	2	1	1.26	1.84	4.24	12	5.1	70.2	0.59	3.23	5.9	2	2.95	10.5	233	0.0450644

## Sheet: logistic新增
性别	年龄	二型糖尿病	高血压	基因型	血栓风险评分表	HDL	LDL	GLU	同型半胱	糖化	ADP末次结果	甘油三酯	胆固醇	中性粒细胞绝对值	淋巴细胞绝对值	中淋比值	血小板平均体积	血小板	血小板体积与数量比值
0	1	0	1	0	0	1.15	3.99	4.9	7	5.4	1	0.87	2.51	7.3	0.9	8.11111	10.7	258	0.0414729
0	1	0	1	0	2	1.41	3.57	4.35	6	6.1	1	1.18	5.48	3.1	0.9	3.44444	10.8	136	0.0794118
0	0	0	1	1	3	1.06	3.14	4.59	12	5.7	1	3.05	4.94	4.2	1.8	2.33333	10.1	310	0.0325806
0	0	0	0	2	3	1.11	4.48	5.94	8.9	6	1	2.06	6.08	6.3	3.5	1.8	12.4	126	0.0984127
1	0	0	1	1	2	1	3.34	6.37	12	5.3	1	1.6	4.54	2.6	1.3	2	11.2	154	0.0727273
0	1	1	1	0	0	0.84	2.2	7.1	11	11.2	1	1.24	3.3	4.4	1.4	3.14286	12.2	178	0.0685393
0	0	0	1	1	0	0.87	1.73	7.39	11	7.9	1	1.06	2.82	6.1	1.7	3.58824	11.4	250	0.0456
1	1	0	1	2	1	0.93	2.84	5.03	12	5.4	1	2.9	5.4	2.7	1.2	2.25	10.8	182	0.0593407
1	1	0	1	1	1	1.24	2.29	4.97	8	5.4	1	1.2	3.79	4.6	1.6	2.875	10.6	296	0.0358108
1	1	0	1	0	0					6.7	1	5.09	4.42	9.1	2.1	4.33333	10.1	336	0.0300595
0	0	0	0	0	0	0.96	3.43	4.29	8	5.4	1	1.09	4.88	3.4	1.4	2.42857	10.8	202	0.0534653
0	1	1	1	1	1	0.98	1.34	7.81	13	7	1	0.52	2.33	4.2	1.1	3.81818	10.5	162	0.0648148
0	1	1	1	2	2	0.91	1.68	5.83	13.9	5.6	1	2.1	6.8	5.9	2.2	2.68182	10.1	332	0.0304217
0	1	0	0	1	2	0.87	2.16	4.13	19	5.8	1	0.83	3.36	5.6	1.7	3.29412	10.6	430	0.0246512
1	1	0	1	0	0	1.02	3.37	4.9	16	5.6	1	1.15	4.78	1.9	1.5	1.26667	10.4	191	0.0544503
0	0	0	0	2	1	1.26	1.84	4.24	11	5.1	1	0.59	3.23	5.9	2	2.95	10.5	233	0.0450644
1	0	0	1	2	1						1	1.78	5.88	4.6	2.6	1.76923	9.9	319	0.0310345
0	0	0	1	1	0	0.84	3.12	4.28	16	4.6	1	0.62	4.96	4.8	0.8	6	10.1	334	0.0302395
0	1	0	0	1	1	1.28	1.75	4.38	9	5.2	1	0.64	3.05	3.4	1.1	3.09091	10.8	163	0.0662577
0	0	0	1	0	1	1	3.64	5.2	6	5.6	1	1.09	5.02	4.8	1.8	2.66667	9.1	196	0.0464286
0	0	0	1	0	1	0.75	1.73	8.66	11	8.5	1	2.05	2.78	3.7	0.9	4.11111	11.7	169	0.0692308
1	1	0	0	1	0	1.36	4.19	5.53	11	6.2	1	1.37	6.9	8.8	1.3	6.76923	9.8	263	0.0372624
1	1	0	1	2	2	0.65	3	4.24		8.1	1	3.14	4.34	5.3	1.4	3.78571	10.7	222	0.0481982
1	1	1	1	1	2	0.86	2.85	8.01	49	9.1	1	1.49	4.01	3	2	1.5	11.3	228	0.0495614
0	1	0	1	2	1	0.95	1.6	6.32	6	6.6	1	0.89	2.65	3.6	1.9	1.89474	10.6	207	0.0512077
0	1	0	1	2	2	0.97	2.63	5.49	12	6.4	1	0.97	3.91	3.7	1.4	2.64286	10.7	214	0.05
0	1	0	0	0	5	1.45	3.44	6.05		6.5	1	0.84	3.78	4.3	1.3	3.30769	11.7	230	0.0508696
0	0	0	1	0	0	1.23	4.6	4.73	7	5.9	1	1.84	6.48	3.9	1.3	3	10.35	379	0.0273087
0	0	0	0	1	4	0.83	2.56	4.93	14	5	1	1.17	3.78	6.5	1.3	5	9.4	183	0.0513661
0	0	0	1	1	1	0.86	2.98	4.73	11	5.3	1	1.2	4.17	9	1	9	10	180	0.0555556
0	0	1	0	1	0	0.73	4.44	7.7	9	7.9	1	1.11	3.95	4	2.1	1.90476	9.6	283	0.0339223
0	1	0	1	0	2	1.29	3.42	4.78	6	5.7	1	1.19	5.47	3.7	2.3	1.6087	11.9	224	0.053125
1	1	1	1	1	1	1.12	4.19	9.8	16	8.4	1	1.29	5.99	2.3	3	0.766667	12.6	148	0.0851351
0	0	0	0	1	1	0.79	3.49	5.27	13	5.6	1	1.64	4.73	4.1	1.9	2.15789	9.1	325	0.028
0	1	0	0	2	1	0.95	2.07	4.53	11	5.2	1	0.94	3.44	4.66	1.4	3.32857	10.6	157	0.0675159
0	0	0	0	2	0	0.89	2.47	4.32	14	5.3	1	1.31	3.81	4.2	1.7	2.47059	9.5	232	0.0409483
0	1	0	0	2	2	1.36	1.82	4.29	12	6	1	0.61	3.48	3.5	1.4	2.5	11.2	205	0.0546341
1	0	0	0	1	1	0.83	3.82	4.54	11	5.1	1	1.15	5.28	4.3	1.7	2.52941	11.1	259	0.0428571
0	0	0	1	1	1	0.82	3.12	4.31	9	6.2	1	1.67	3.24	2.8	1.3	2.15385	11	197	0.0558376
1	0	1	1	1	2						1	1.3	5.66	6.6	1.8	3.66667	11.6	253	0.0458498
0	1	0	0	2	1	1.48	3.05	2.77	13	5.3	1	1.25	4.81	8.5	0.4	21.25	10.4	211	0.0492891
0	1	0	1	1	0	0.84	1.87	4.74	15	6.7	1	0.92	2.98	3.7	1.4	2.64286	10.2	349	0.0292264
0	1	0	1	1	4						1	1.1	3.2	3.1	1.1	2.81818	9.7	225	0.0431111
1	1	1	0	1	1	1.77	3.25	6.97	12	6.9	1	0.86	4.61	3.7	2.5	1.48	10	307	0.0325733
1	1	0	0	2	2	1.25	2.15	4.84			1	1.09	3.6	3.8	1.2	3.16667	10	277	0.0361011
0	1	1	1	1	1				12		1	1.3	5.7	8.4	0.9	9.33333	11.9	138	0.0862319
0	1	0	1	1	5	0.79	2.6	4.56	11		1	0.89	3.81	4	1.7	2.35294	9.6	192	0.05
1	1	0	1	1	1	1.08	2.26	7.78		6.9	1	1.21	3.68	2.8	1.7	1.64706	10.4	202	0.0514851
0	0	0	0	2	0	1.01	2.55	3.69	20	5.6	1	0.64	3.86	3.3	2.3	1.43478	11.7	179	0.0653631
0	0	0	1	1	1	1.05	3.12	5.57	13	5.4	1	2.96	4.84	4.1	2	2.05	8.6	274	0.0313869
1	0	1	0	1	0	1.35	2.17	6.68		8.4	1	1.25	3.96	2.5	2.1	1.19048	10.4	206	0.0504854
0	1	1	1	1	1	0.73	1.95	7.31	14	6	1	1.83	2.96	3.4	1.3	2.61538	11	210	0.052381
0	0	1	0	1	1	0.84	3.4	13.59		9.3	1	3.09	4.99	8.5	0.8	10.625	10.8	270	0.04
0	0	1	1	1	0	0.98	3.03	6.74	14	6.8	1	1.64	4.48	7.8	1.7	4.58824	10.9	221	0.0493213
0	0	0	1	1	1	0.96	2.32	4.95			1	1.15	3.57	4.4	1.3	3.38462	12.1	220	0.055
0	1	0	0	1	1	1.19	3.01	4.54	16		1	1.16	4.46	4	1.3	3.07692	10.4	270	0.0385185
0	1	0	1	1	1	1.03	2.87	4.34	14		1	1.51	4.48	6.6	1.7	3.88235	12.1	298	0.040604
0	0	0	1	0	1	1.4	2.71	5.14	9		1	1.37	4.6	5.4	2.1	2.57143	10.9	236	0.0461864
0	0	0	1	1	0	0.92	1.74	5.38	14		1	1.13	2.9	2.3	1.6	1.4375	9.5	311	0.0305466
0	1	0	1	1	5	0.58	2.3	3.9	14	5.6	1	1.68	3.35	7.9	1.7	4.64706	10.8	325	0.0332308
1	1	0	0	1	2	1.36	3.1	5.81	13	5.6	1	1.36	7.75	1.3	1.4	0.928571	10.4	212	0.0490566
0	1	0	1	1	1	0.83	3.28	5.58	10	5.7	1	2.43	4.75	7.8	2.1	3.71429	10.9	188	0.0579787
0	1	1	1	2	2	1.51	5.86	6.87	9	6.5	1	1.81	8.03	4.8	3.1	1.54839	12.4	188	0.0659574
0	1	0	1	1	2	0.75	1.81	7.31	12	6.6	1	1.36	4.97	4	1.5	2.66667	9.5	277	0.034296
0	1	0	1	2	2	1.22	3.99	6.48	14	5.9	1	1.67	6.25	3.5	1.3	2.69231	11.4	202	0.0564356
1	0	1	0	1	2	1.26	1.54	4.91	13		1	0.42	2.81	4	1.7	2.35294	11.1	169	0.0656805
1	0	1	0	0	1	0.75	2.43	11.08	7	13.5	1	1.23	3.65	5.5	2.6	2.11538	10.6	273	0.0388278
0	1	0	0	0	2	1.41	2.41	4.26	10	5.3	1	0.99	4.07	7.6	1.2	6.33333	10.9	201	0.0542289
0	0	0	1	1	2	1.47	2.66	4.53	10	5.1	1	1.08	4.4	8.2	1.4	5.85714	10.1	239	0.0422594
0	0	0	0	1	1						1	1.2	5.4	5.4	1.1	4.90909	11	239	0.0460251
0	0	0	1	1	1	0.79	4.34	4.95	15	7.7	1	1.85	5.86	8	2.4	3.33333	10.9	320	0.0340625
0	1	1	1	1	0	1.02	2.91	7.88	9	7.3	1	1.32	4.3	7.6	1.4	5.42857	11.3	197	0.0573604
0	0	1	0	1	1	1.29	2.18	4.31	11	5.8	1	1.42	7.32	3.1	1.4	2.21429	9.8	279	0.0351254
0	1	0	1	1	0	0.78	2.31	4.1	14	6.6	1	1.07	3.31	3.1	1.2	2.58333	8.9	242	0.0367769
1	0	0	1	0	0	1.12	3.55	4.55	9	5.3	1	1.58	5.25	4.2	1.6	2.625	11.1	240	0.04625
1	0	1	1	1	1	0.89	2.48	8.37	11	10.3	1	1.31	3.64	4.5	1.3	3.46154	10.8	280	0.0385714
0	0	1	1	1	1	1.06	2.89	7.42	14	7	1	3.24	4.5	4.8	2.9	1.65517	9.6	201	0.0477612
0	0	0	0	1	1	0.84	1.59	4.67	9	5.2	1	0.96	2.6	2.6	1.3	2	10.6	123	0.0861789
0	0	1	0	0	0	0.66	3.33	11.81	12	12	1	1.41	4.55	5.6	2.3	2.43478	11.8	186	0.0634409
1	0	1	1	2	0	1.28	4.51	6.13	14	7.1	1	2.04	4.16	5.3	1.5	3.53333	9.8	234	0.0418803
0	0	0	1	1	1	0.89	3.34	6.44	14	5.2	1	1.63	4.74	5.6	1.7	3.29412	12	241	0.0497925
0	1	0	0	0	0	0.92	2.02	5.05	9		1	1.11	3.73	5.6	1.2	4.66667	10.3	206	0.05
0	0	0	1	2	3	1.13	3.51	5.11	10	5.6	1	0.84	2.24	2.8	2.3	1.21739	12.6	150	0.084
0	0	0	1	1	2	1.23	4.9	5.22	12	6	1	2.25	6.87	4.6	1.8	2.55556	10.7	251	0.0426295
0	1	0	1	1	1	0.97	1.5	4.71	15	5.7	1	0.66	2.62	3.1	0.9	3.44444	9.5	132	0.0719697
0	1	0	1	0	1	0.94	3.74	3.65	8		1	1.5	5.25	5.1	1.6	3.1875	11.1	207	0.0536232
1	1	1	0	1	1	1.19	4.18	6.41	10	9.6	1	1.79	5.8	4.7	1.4	3.35714	10.7	303	0.0353135
0	1	0	0	1	2	1.35	2.89	4.63	11	5.1	1	0.88	4.01	3.9	1.4	2.78571	9.8	221	0.0443439
0	1	1	1	2	2	0.83	2.53	6.35	11	8.3	1	1.61	3.72	6.4	2.5	2.56	9.3	334	0.0278443
0	0	1	1	1	0	0.79	3.15	10.19	16	7	1	1.49	4.46	3.7	2.2	1.68182	10.3	206	0.05
0	1	0	1	1	1	0.71	3.69	5.75	10	5.6	1	1.2	5.4	3.5	1.8	1.94444	11.2	193	0.0580311
0	0	0	1	2	3	1.08	1.86	5.1	11		1	0.82	3.15	3.1	1.3	2.38462	11.1	186	0.0596774
1	0	1	1	1	0	0.81	2.33	6.09	9	6.8	1	1.82	3.49	3.5	3.9	0.897436	10.8	274	0.0394161
1	0	0	0	0	0	1.39	2.55	6.31	12	6.2	1	1.11	4.16	2.5	1.5	1.66667	10.6	231	0.0458874
0	0	0	0	1	1	0.94	2.18	4.77			0	1.05	3.31	5.7	2.4	2.375	10	138	0.0724638
0	0	1	0	0	0	1.16	3.08	5.89	9	6.3	0	1.06	4.47	4.3	1.8	2.38889	9.7	251	0.0386454
0	1	1	1	0	2	0.83	1.85	5.37		7.4	0	1.82	3.05	3	1.4	2.14286	11.6	122	0.095082
0	1	1	1	1	2	0.7	1.53	2.76	8	7.4	0	1.13	2.23	4.3	1.3	3.30769	11.2	310	0.036129
0	0	0	1	1	0	0.95	3.2	4.58	11	5.9	0	1.41	4.62	4.5	1	4.5	10.7	320	0.0334375
0	0	0	1	1	2	1.08	3.44	15.38	16	6.4	0	1.84	5.05	4.4	0.8	5.5	10.6	141	0.0751773
0	1	0	1	1	2					5.9	0	0.7	5.18	4.3	2.1	2.04762	11.3	450	0.0251111
0	1	0	0	0	0	0.94	2.32	5.61	14	6.8	0	1.07	6.8	2.2	1.1	2	11.6	174	0.0666667
0	0	0	1	0	0	1.16	4.05	5.29	11	5.5	0	2.76	5.85	4.5	3.3	1.36364	11.8	330	0.0357576
0	1	0	1	1	2	1.04	2.24	4.62	10	5.6	0	0.6	3.45	11.2	1.7	6.58824	11.1	210	0.0528571
1	1	0	1	1	2	1.45	2.61	4.59	16	6.1	0	0.57	4.19	4.2	1.7	2.47059	10.9	200	0.0545
1	1	0	1	1	0	1.03	2.58	4.31	10	5.9	0	1.12	3.95	1.8	0.3	6	9.3	228	0.0407895
1	1	0	1	1	0	1.12	3.69	5.04	11	6.2	0	2.23	5.52	3.6	2.2	1.63636	10.7	179	0.0597765
0	1	0	1	2	2	0.72	2.09	5.83	6		0	1.26	3.22	4.5	1	4.5	10.1	234	0.0431624
0	0	0	0	0	1	1.06	4.06	4.58	7	5.4	0	1.97	5.89	1.8	0.5	3.6	10.4	203	0.0512315
1	0	0	1	1	0	1.01	1.72	5.3	13	4.6	0	1.91	2.66	5.4	2.6	2.07692	11	211	0.0521327
0	0	0	1	1	0	1.1	3.56	5.66	16	5.7	0	3.76	4.93	5.2	1.6	3.25	11.6	156	0.074359
1	1	0	1	0	0	0.87	1.78	4.95	7	5.1	0	1.57	2.96	4.6	3.2	1.4375	12	230	0.0521739
0	1	0	1	0	0	0.78	1.66	10.2	10	9.4	0	1.65	2.67	6	1.9	3.15789	11.2	193	0.0580311
0	0	1	1	1	2	1.1	1.59	9.82	12	11.1	0	1.35	2.83	5	1.4	3.57143	11.5	142	0.0809859
0	1	0	1	2	1	0.56	3.28	6.28		7.2	0	1.86	4.5	2	2.1	0.952381	10	58	0.172414
0	1	0	1	1	1	0.99	2.15	5.32		5.6	0	1.13	2.62	4	1.1	3.63636	10.3	244	0.0422131
0	0	0	1	0	0	1.05	2.69	5.89	10	6.3	0	1.51	4.02	4	1.2	3.33333	10	267	0.0374532
0	0	0	1	1	1	0.9	2.74	6.61	15	7	0	1.31	2.48	8.9	1.2	7.41667	10.4	251	0.0414343
0	1	0	0	1	2	0.74	2.34	5.91	11	6.6	0	1.6	3.39	6.2	1.4	4.42857	10.9	98	0.111224
0	0	0	0	1	1	0.97	4.3	5.05		5	0	3.05	6.81	3	1.6	1.875	10.1	197	0.051269
0	0	0	1	1	2	1.46	4.07	7.01	12	5.1	0	1.46	6.02	6	2	3	11.7	205	0.0570732
0	0	0	1	1	1	0.96	3.18	4.28	8	5.9	0	1.86	4.74	7	1.3	5.38462	10.4	264	0.0393939
0	1	1	1	0	5	0.78	2.57	6.83	6	8.3	0	1.12	3.78	4.3	2.2	1.95455	10.5	240	0.04375
0	1	0	1	2	3	1.04	4.05	8.23	6	8.1	0	1.9	5.84	6	2.2	2.72727	11.1	214	0.0518692
0	1	0	1	1	1	1.53	2.47	5.49	12	6.6	0	0.99	4.33	4.5	1.4	3.21429	9.8	196	0.05
1	0	0	1	1	0	0.82	2.81	7.25	6	5.7	0	3.21	4.39	2.4	1.4	1.71429	10.2	320	0.031875
0	1	1	1	1	1	1.31	2.37	6.23	6	6.6	0	1.3	4.5	4	1	4	11.1	203	0.0546798
0	0	0	1	1	0	0.86	1.94	4.89	12	5.9	0	0.98	3	3.1	0.6	5.16667	10	277	0.0361011
0	0	1	0	0	1	0.78	2.04	5.27	9	7.6	0	1.31	3.18	5.6	1.8	3.11111	10.4	153	0.0679739
1	1	0	1	0	5	1.1	3.19	4.54	8	6.3	0	2.58	4.88	3.9	2.2	1.77273	10.8	245	0.0440816
0	1	0	1	1	0	1.48	2.39	4.31	11	5.5	0	1	4.14	5.8	1.1	5.27273	8.7	191	0.0455497
0	1	0	1	0	0	1.11	1.8	6.98	7	6.2	0	0.98	3.05	4.1	0.9	4.55556	9.4	211	0.0445498
0	0	0	0	0	0	0.85	4.36	4.49	9	5.6	0	0.97	5.92	4	2	2	10.7	231	0.0463203
0	1	1	0	1	2	1	3.67	5.52	10	6.6	0	1.09	5.11	5.4	2.2	2.45455	10.6	219	0.0484018
0	1	0	1	0	0	0.7	2.08	5.7	8		0	1.19	3.03	4.3	1.7	2.52941	10.4	260	0.04
0	1	0	0	0	0	0.93	2.42	4.91	9	6.2	0	1.61	3.62	3.6	1.9	1.89474	9.2	229	0.0401747
1	1	1	1	1	2	1.22	4	6.92	8	8.5	0	2.03	5.77	7	1.3	5.38462	11.4	263	0.043346
1	0	0	1	0	0	0.96	3.36	4.61	6	4.8	0	0.69	4.74	2.4	1.4	1.71429	11.1	240	0.04625
1	1	1	1	1	2	1.31	1.85	4.26	9	6.6	0	0.85	3.34	2.9	1.6	1.8125	10.3	217	0.0474654
0	0	0	1	1	1	0.9	3.38	8.46	11	9.7	0	1.54	4.93	11.4	1.8	6.33333	10.9	316	0.0344937
0	0	0	0	0	1	0.77	3.32	8.31	9	9.2	0	1.38	4.62	4	1	4	11.1	210	0.0528571
0	1	0	0	0	0	1.15	3.7	5.9	11	6.6	0	0.99	2.79	5.4	2	2.7	9.8	212	0.0462264
1	0	0	1	1	0	1.37	4.58	5.51	8	7.3	0	1.12	3.51	4	2.5	1.6	10.6	262	0.040458
1	1	1	1	1	3	1.04	3.29	5.9	11	6.2	0	1.12	4.64	2.9	1.6	1.8125	10	322	0.0310559
0	1	0	0	1	1	1.38	3.03	4.56	13	5.6	0	0.71	3.65	2.8	0.5	5.6	10	163	0.0613497
0	1	0	0	2	1	0.98	2.39	4.09	11	5.7	0	0.8	3.28	5.2	1.9	2.73684	11.1	170	0.0652941
0	0	1	1	0	0	0.89	3.38	7.22	7		0	1.07	4.62	4.1	0.7	5.85714	8.5	293	0.0290102
1	1	1	1	0	0	1.43	4.06	10.78	10	9.4	0	1.96	6.2	8.7	1.2	7.25	9.7	249	0.0389558
0	0	0	0	1	3	1.35	2.95	7.76	10	10.6	0	1.38	3.11	5.2	0.7	7.42857	12.1	83	0.145783
0	0	0	0	2	2	1.19	4.54	5.31		5.8	0	2.1	6.27	3.2	1.6	2	9.5	207	0.0458937
0	0	1	1	0	0	0.71	1.76	6.34	10	6.6	0	1.2	4.6	10.2	1.3	7.84615	12.4	289	0.0429066
1	1	0	1	0	5	1.72	4.41	5.95	7	5.5	0	0.75	7.06	3.1	0.8	3.875	11.1	204	0.0544118
1	1	0	1	0	2	1.38	3.06	5.4	10	5.2	0	4.25	5.4	2.5	2.8	0.892857	10.6	277	0.0382671
0	0	1	1	0	0	1.09	2.81	4.83		7.1	0	1.97	4.3	9.5	1.8	5.27778	10	300	0.0333333
0	0	1	1	0	1	0.84	2.08	3.37	13	7.6	0	0.76	3.18	5.4	1.8	3	10.1	260	0.0388462
1	0	0	1	1	4	1.26	2.24	4.36	9	6.8	0	0.83	3.73	8.7	0.7	12.4286	10.9	255	0.0427451
1	1	1	1	2	1	1.05	3.61	5.1	13	7.2	0	1.13	5.36	7.2	3.2	2.25	9.8	300	0.0326667
0	0	0	1	2	1	0.86	3.21	5.3	9	4.5	0	2.87	4.83	3.3	1.8	1.83333	10.7	197	0.0543147
0	1	0	1	0	0	1.09	2.61	4.76	8	4	0	1.4	4.3	4.6	1.7	2.70588	10	199	0.0502513
0	0	0	1	0	0					5	0	2.32	4.37	5.4	1.8	3	12.3	209	0.0588517
0	1	0	1	1	2	0.72	3.09	4.93		5.4	0	1.3	4.62	3.2	1.1	2.90909	11.3	137	0.0824818
0	1	0	1	0	0	1.85	3.15	4.94	8	5.3	0	0.57	5.06	3	1.8	1.66667	11.7	206	0.0567961
0	0	1	1	1	2	0.7	2.17	8.29	17	10.9	0	2.35	3.23	5.5	1.7	3.23529	11.4	271	0.0420664
0	1	0	1	0	1	1.13	2.14	4.82	9	5.8	0	1.2	3.63	1.9	2.2	0.863636	10.9	152	0.0717105
1	1	1	0	2	4	1.24	2.93	7.6	13		0	2.08	4.64	4.8	1.9	2.52632	11.9	228	0.052193
1	0	0	1	0	0	1.28	2.06	4.83	7	5.2	0	0.7	3.46	4.4	1.4	3.14286	11.8	202	0.0584158
0	1	0	1	1	5	1.35	3.98	5.36		5.5	0	3.93	5.88	4.4	1.6	2.75	9.7	388	0.025
0	1	0	1	0	0	0.8	2.58	4.8	8	4.9	0	2.16	3.96	3.2	0.7	4.57143	10	185	0.0540541
0	0	0	1	2	0	0.94	1.38	4.23		5.6	0	1.1	2.4	3.5	1.8	1.94444	11.1	189	0.0587302
0	1	0	1	0	0	1.22	4.77	6.39	7	6.1	0	2.47	6.72	11.6	1.2	9.66667	12.5	153	0.0816993
0	1	0	0	1	1				12		0	1.2	4.3	5.8	0.5	11.6	10.7	102	0.104902
1	1	0	1	0	0	1.26	2.43	4.63		5.2	0	1.99	4.08	4.1	1	4.1	10.7	157	0.0681529
1	0	0	0	0	1	0.72	2.36	4.94	9	4.7	0	4.2	3.67	6.7	1.6	4.1875	9.5	260	0.0365385
1	0	0	0	0	1	1.03	1.67	5.75	16	5.4	0	1.28	2.88	2.7	1.4	1.92857	11.8	196	0.0602041
0	0	0	1	1	4	1.03	1.98	4.76	7	5.5	0	1.12	4.09	3.4	2	1.7	11	266	0.0413534
0	1	0	1	0	4	0.65	2.9	4.88	11	5.2	0	1.66	4.05	4.3	1.6	2.6875	10.6	240	0.0441667
0	0	0	0	0	1	1.03	2.37	11.17	8	8.9	0	0.97	3.81	5.6	2.3	2.43478	10.5	278	0.0377698
1	1	1	0	0	0	0.65	2.37	6.04	8	7.8	0	1.03	3.38	5.8	1.5	3.86667	9.9	195	0.0507692
1	0	0	0	0	0	1.17	4.38	7.12	8	7.2	0	1.33	4.83	3.3	1.3	2.53846	8.7	221	0.0393665
1	1	0	1	0	1	0.91	3	6.36	7	6.6	0	2.02	4.51	2.1	0.5	4.2	11.2	244	0.0459016
1	1	0	1	0	3	1.24	4.68	4.63	9	5.7	0	2.21	6.86	5.9	1.9	3.10526	10.6	280	0.0378571
1	0	0	0	0	0	1	2.7	4.63	8	5.7	0	0.4	2.82	3.9	1.5	2.6	10.3	260	0.0396154
0	1	0	1	0	1	1.09	1.62	4.77	16.6	5.3	0	0.4	2.84	2.6	1.3	2	11.2	310	0.036129
1	0	1	1	0	0	1.46	4.33	5.27	6	6	0	1.18	5.3	7.1	2.7	2.62963	9.8	362	0.0270718
0	0	0	1	0	0	0.85	2.43	4.71	10	5.8	0	1.25	3.68	7.3	1.1	6.63636	10	477	0.0209644
0	1	0	1	0	0	1.02	1.53	4.69	8	4	0	0.61	2.58	5.2	1.2	4.33333	9.6	264	0.0363636
0	1	1	1	2	1	1.02	1.53	4.69	13	7.3	0	1.62	4.18	4.3	0.8	5.375	11.2	146	0.0767123
0	0	0	1	1	4	0.86	2.88	6.21	12	6	0	2.01	3.43	6.7	2	3.35	9	268	0.0335821
0	0	0	1	0	0	0.86	3.1	4.65	7	5.1	0	2.7	4.58	4.4	1.6	2.75	10.8	350	0.0308571
1	1	0	1	0	1	0.73	2.19	6.34	8	6	0	1.4	4.49	3.8	1.2	3.16667	9.7	209	0.0464115
0	1	0	1	0	1	1	2.98	5.12	10	6.6	0	1.67	4.42	6.5	1.7	3.82353	11.4	222	0.0513514
0	0	0	1	0	1	0.87	3.68	4.6	7	5.5	0	1.82	5.39	4	3	1.33333	11.5	183	0.0628415
1	1	1	1	0	1	1.08	2.12	5.15	6	6.8	0	0.94	3.4	4.2	1.3	3.23077	10	248	0.0403226
0	0	0	0	1	0	1.02	1.84	10.2	12	7.1	0	1.43	2.78	2.3	1.2	1.91667	10.1	234	0.0431624
0	1	0	1	0	0	0.89	3	5.07	9	4.2	0	1.21	2.7	4.4	2	2.2	10.4	222	0.0468468
0	1	0	0	1	0	1.28	3.7	5.54	8	6	0	0.93	3.13	4	0.7	5.71429	10.9	212	0.0514151
0	0	0	0	0	0	0.78	3.18	5.97	7	5.3	0	3	4.57	5.3	2	2.65	9.2	296	0.0310811
0	1	0	1	1	1	1.09	3.23	6.94	11	5.3	0	1.48	3.22	5.8	1	5.8	9.8	266	0.0368421
0	0	0	1	0	1	0.96	2.59	5.96	12.2	5.5	0	1.32	3.99	3.7	1.1	3.36364	11.1	228	0.0486842
0	0	0	0	0	0	0.66	2.21	5.42	7	7	0	1.26	2.25	3.8	2	1.9	11.3	161	0.0701863
0	1	0	1	0	0	1.19	3.19	5.67	7	6.6	0	1.26	4.91	2.1	1.3	1.61538	10.3	236	0.0436441
1	1	0	1	1	2	1.19	3.85	5.14	11.4	5.6	0	1.11	3.46	5.6	1	5.6	9.5	259	0.0366795
0	1	0	1	1	1	0.92	3.05	5.8	11.2	6.6	0	1.44	4.69	4.1	1.7	2.41176	9.9	297	0.0333333
1	1	0	1	0	1	1.11	1.83	5.8	7	6.5	0	1.16	3.17	3.15	1.4	2.25	11.2	130	0.0861538
1	1	0	1	0	5	0.81	1.63	4.99	7.3	5.6	0	0.73	2.57	2.5	1	2.5	9.8	178	0.0550562
0	0	0	0	0	1	0.82	1.37	5.83	9.1	6.6	0	1.01	2.65	3.9	1.5	2.6	10.5	221	0.0475113
0	0	0	0	0	0	0.82	1.37	5.83	9.1	6.6	0	1.01	2.65	3.9	1.5	2.6	10.5	221	0.0475113
0	0	0	0	0	0	1.11	1.85	4.71	10	4	0	0.78	3.12	2.4	1.7	1.41176	10.6	214	0.0495327
0	0	0	1	1	1	1.12	2.23	4.73	12	4	0	0.98	3.5	3	1.7	1.76471	9.9	179	0.0553073
0	0	0	0	2	2	1.15	2.35	5.56	11	4.8	0	1.62	3.76	8.7	2.1	4.14286	10	228	0.0438596
0	1	0	0	0	0	1.2	1.6	4.8	9.2	5.8	0	0.89	4.54	3.9	1.5	2.6	10.7	210	0.0509524
0	1	1	1	0	0	1.26	1.77	4.75	9	7.2	0	0.42	3.03	5.6	1.6	3.5	8.8	263	0.0334601
0	1	0	0	0	1	0.85	2.12	4.72	8	6.1	0	4.83	7	4.6	1.8	2.55556	11.2	266	0.0421053
0	1	0	1	1	2	0.53		7.23	12	6.1	0	0.82	3.21	9.7	0.9	10.7778	11.3	133	0.0849624

## Sheet: 反应组
姓名	性别	年龄	诊断	2型糖尿病	高血压	rs4244285	rs4986893	rs12248560	基因型	代谢型	血栓风险评分表	ADP末次结果	甘油三酯	胆固醇	中性粒细胞淋巴细胞		中/淋比值	血小板平均体积	血小板
包菊利	女	76	高血压	是	是	G/A	G/G	C/T	*2/*17	中间代谢型	1	36.6	1.13	5.36	7.2	3.2	2.25	9.8	300
周如良	男	82	椎动脉狭窄	否	是	G/G	G/G	C/C	*1/*1	快代谢型	1	32.4	1.2	3.63	1.9	2.2	0.863636	10.9	152
王月琴	女	72	脑梗死	否	是	G/G	G/G	C/C	*1/*1	快代谢型	2	38.5	4.25	5.4	2.5	2.8	0.892857	10.6	277
吕建章	男	65	脑梗死	否	是	G/A	G/A	C/C	*2/*3	慢代谢型	1	47.5	1.86	4.5	2	2.1	0.952381	10	58
励贵良	男	58	脑梗死	否	是	G/G	G/G	C/C	*1/*1	快代谢型	1	26.6	1.82	5.39	4	3	1.33333	11.5	183
林力自	男	37	脑梗死	否	是	G/G	G/G	C/C	*1/*1	快代谢型		48.7	2.76	5.85	4.5	3.3	1.36364	11.8	330
舒汶	男	52	锁骨下动脉狭窄	否	否	G/G	G/G	C/C	*1/*1	快代谢型	0	12.4	0.78	3.12	2.4	1.7	1.41176	10.6	214
杨秀山	女	65	脑干急性脑梗死	否	是	G/G	G/G	C/C	*1/*1	快代谢型		48.2	1.57	2.96	4.6	3.2	1.4375	12	230
陈爱珍	女	62	短暂性大脑缺血性发作	否	是	G/A	G/G	C/C	*1/*2	中间代谢型	0	40.3	1.12	3.51	4	2.5	1.6	10.6	262
毛乾宝	男	68	症状性癫痫[继发性癫痫]	否	是	G/G	G/G	C/C	*1/*1	快代谢型		20	1.26	4.91	2.1	1.3	1.61538	10.3	236
林芬婷	女	67	脑动脉供血不足	否	是	G/G	G/A	C/C	*1/*3	中间代谢型	0	48.5	2.23	5.52	3.6	2.2	1.63636	10.7	179
沙明飞	男	67	脑梗死	否	是	G/G	G/G	C/C	*1/*1	快代谢型		32.7	0.57	5.06	3	1.8	1.66667	11.7	206
程发球	男	60	脑梗死	否	是	G/A	G/G	C/C	*1/*2	中间代谢型	4	30	1.12	4.09	3.4	2	1.7	11	266
徐丹丹	女	43	脑梗死	否	是	G/G	G/G	C/C	*1/*1	快代谢型		40.8	0.69	4.74	2.4	1.4	1.71429	11.1	240
田凤琴	女	55	脑梗死	否	是	G/A	G/G	C/C	*1/*2	中间代谢型	0	43.5	3.21	4.39	2.4	1.4	1.71429	10.2	320
田茂爱	男	52	脑梗死	否	是	G/A	G/G	C/C	*1/*2	中间代谢型		10.4	0.98	3.5	3	1.7	1.76471	9.9	179
吴琴素	女	76	脑梗死	否	是	G/G	G/G	C/C	*1/*1	快代谢型	5	42.5	2.58	4.88	3.9	2.2	1.77273	10.8	245
罗菊芬	女	70	脑梗死	是	是	G/A	G/G	C/C	*1/*2	中间代谢型		40.2	1.12	4.64	2.9	1.6	1.8125	10	322
张亚云	女	65	左侧脑桥急性脑梗死	是	是	G/A	G/G	C/C	*1/*2	中间代谢型		40.5	0.85	3.34	2.9	1.6	1.8125	10.3	217
刘开前	男	60	脑梗死	否	是	A/A	G/G	C/C	*2/*2	慢代谢型	1	36.4	2.87	4.83	3.3	1.8	1.83333	10.7	197
姜春山	男	58	短暂性大脑缺血性发作	否	否	G/A	G/G	C/C	*1/*2	中间代谢型	1	44.9	3.05	6.81	3	1.6	1.875	10.1	197
严望亮	男	68	颈内动脉狭窄	否	否	G/G	G/G	C/C	*1/*1	快代谢型		40.8	1.61	3.62	3.6	1.9	1.89474	9.2	229
杨垂芳	男	48	左侧大脑中动脉闭塞和狭窄	否	否	G/G	G/G	C/C	*1/*1	快代谢型	0	20.6	1.26	2.25	3.8	2	1.9	11.3	161
宋振东	男	41	脑梗死	否	否	G/A	G/G	C/C	*1/*2	中间代谢型	0	24.9	1.43	2.78	2.3	1.2	1.91667	10.1	234
竺维琴	女	61	短暂性大脑缺血性发作	否	否	G/G	G/G	C/C	*1/*1	快代谢型	1	30.2	1.28	2.88	2.7	1.4	1.92857	11.8	196
李永定	男	60	脑梗死	否	是	A/A	G/G	C/C	*2/*2	慢代谢型	0	31.1	1.1	2.4	3.5	1.8	1.94444	11.1	189
柳辈文	男	77	多发性脑梗死	是	是	G/G	G/G	C/C	*1/*1	快代谢型	5	43.9	1.12	3.78	4.3	2.2	1.95455	10.5	240
张永昌	男	80	脑梗死	否	是	G/G	G/G	C/C	*1/*1	快代谢型	1	28.2	0.4	2.84	2.6	1.3	2	11.2	310
张安平	男	60	脑梗死	否	否	G/A	G/A	C/C	*2/*3	慢代谢型		39.3	2.1	6.27	3.2	1.6	2	9.5	207
徐维强	男	39	脑梗死	否	否	G/G	G/G	C/C	*1/*1	快代谢型	0	41.2	0.97	5.92	4	2	2	10.7	231
周安康	男	67	胃炎	否	否	G/G	G/G	C/C	*1/*1	快代谢型		48.7	1.07	6.8	2.2	1.1	2	11.6	174
桂岳文	男	75	脑梗死	否	是	G/A	G/G	C/C	*1/*2	中间代谢型		48.7	0.7	5.18	4.3	2.1	2.04762	11.3	450
竺雪琴	女	59	脑梗死	否	是	G/A	G/G	C/C	*1/*2	中间代谢型	0	48.5	1.91	2.66	5.4	2.6	2.07692	11	211
汪信康	男	75	脑梗死	是	是	G/G	G/G	C/C	*1/*1	快代谢型	2	48.9	1.82	3.05	3	1.4	2.14286	11.6	122
田康杰	男	69	脑梗死	否	是	G/G	G/G	C/C	*1/*1	快代谢型		24.4	1.21	2.7	4.4	2	2.2	10.4	222
奚芝兰	女	65	左侧脑梗死	是	是	G/G	G/G	C/C	*1/*1	快代谢型	1	16.1	1.16	3.17	3.15	1.4	2.25	11.2	130
宋会保	男	57	脑梗死	否	否	G/A	G/G	C/C	*1/*2	中间代谢型	1	49.6	1.05	3.31	5.7	2.4	2.375	10	138
罗献忠	男	61	颈动脉狭窄脑梗死	是	否	G/G	G/G	C/C	*1/*1	快代谢型		49.3	1.06	4.47	4.3	1.8	2.38889	9.7	251
罗奶玉	男	84	胸痛待查	否	是	G/G	G/A	C/C	*1/*3	中间代谢型	1	16.2	1.44	4.69	4.1	1.7	2.41176	9.9	297
陈真学	男	62	脑梗死	否	否	G/G	G/G	C/C	*1/*1	快代谢型	1	29.1	0.97	3.81	5.6	2.3	2.43478	10.5	278
闻岳全	男	68	脑血管病	是	否	G/G	G/A	C/C	*1/*3	中间代谢型		41.1	1.09	5.11	5.4	2.2	2.45455	10.6	219
傅振飞	女	76	脑梗死	否	是	G/A	G/G	C/C	*1/*2	中间代谢型	2	48.5	0.57	4.19	4.2	1.7	2.47059	10.9	200
赵芬琴	女	89	脑梗死	否	是	G/G	G/G	C/C	*1/*1	快代谢型	5	15.5	0.73	2.57	2.5	1	2.5	9.8	178
陈根莲	女	65	右侧脑桥急性脑梗死	是	否	A/A	G/G	C/C	*2/*2	慢代谢型	4	32.3	2.08	4.64	4.8	1.9	2.52632	11.9	228
孙秋根	男	68	冠状动脉粥样硬化性心脏病	否	是	G/G	G/G	C/C	*1/*1	快代谢型		40.8	1.19	3.03	4.3	1.7	2.52941	10.4	260
张秀荣	女	60	脑梗死	否	否	G/G	G/G	C/C	*1/*1	快代谢型	0	28.7	1.33	4.83	3.3	1.3	2.53846	8.7	221
张持平	男	69	脑梗死	否	否	G/G	G/G	C/C	*1/*1	快代谢型	1	1.27	4.83	7	4.6	1.8	2.55556	11.2	266
徐正丰	男	70	颈内动脉狭窄(虹吸段,右侧伴重度狭窄)	否	否	G/G	G/G	C/C	*1/*1	快代谢型		5.5	0.89	4.54	3.9	1.5	2.6	10.7	210
陆文军	男	61	大脑中动脉狭窄	否	否	G/G	G/G	C/C	*1/*1	快代谢型	1	14.4	1.01	2.65	3.9	1.5	2.6	10.5	221
陆文军	男	61	大脑中动脉狭窄	否	否	G/G	G/G	C/C	*1/*1	快代谢型		14.4	1.01	2.65	3.9	1.5	2.6	10.5	221
唐仙娥	女	49	大脑中动脉狭窄	否	否	G/G	G/G	C/C	*1/*1	快代谢型	0	28.3	0.4	2.82	3.9	1.5	2.6	10.3	260
王亚珍	女	59	下肢动脉硬化闭塞症	是	是	G/G	G/G	C/C	*1/*1	快代谢型		28	1.18	5.3	7.1	2.7	2.62963	9.8	362
丁杰	男	25	脑血管病	否	否	G/G	G/G	C/C	*1/*1	快代谢型		22.5	3	4.57	5.3	2	2.65	9.2	296
何文明	男	68	脑梗死	否	是	G/G	G/G	C/C	*1/*1	快代谢型	4	29.8	1.66	4.05	4.3	1.6	2.6875	10.6	240
邹天麟	男	76	颈动脉狭窄	否	否	G/G	G/G	C/C	*1/*1	快代谢型		40.4	0.99	2.79	5.4	2	2.7	9.8	212
严荣明	男	65	脑梗死	否	是	G/G	G/G	C/C	*1/*1	快代谢型		36	1.4	4.3	4.6	1.7	2.70588	10	199
季阿牛	男	71	周围性面神经麻痹	是	是	A/A	G/G	C/C	*2/*2	慢代谢型		43.9	1.9	5.84	6	2.2	2.72727	11.1	214
陈友助	男	72	言语障碍	否	否	A/A	G/G	C/C	*2/*2	慢代谢型	1	39.9	0.8	3.28	5.2	1.9	2.73684	11.1	170
周金标	男	45	脑梗死	否	是	G/G	G/G	C/C	*1/*1	快代谢型		27.2	2.7	4.58	4.4	1.6	2.75	10.8	350
李珠定	男	71	急性大面积脑梗死	否	是	G/A	G/G	C/C	*1/*2	中间代谢型	5	31.9	3.93	5.88	4.4	1.6	2.75	9.7	388
林惠章	男	75	脑梗死	否	是	G/A	G/G	C/C	*1/*2	中间代谢型		32.8	1.3	4.62	3.2	1.1	2.90909	11.3	137
李正齐	男	52	脑梗死	否	是	G/G	G/G	C/C	*1/*1	快代谢型		33.7	2.32	4.37	5.4	1.8	3	12.3	209
高国振	男	57	脑梗死	是	是	G/G	G/G	C/C	*1/*1	快代谢型	1	37.8	0.76	3.18	5.4	1.8	3	10.1	260
李鸣	男	60	大脑动脉血栓形成引起的脑梗死	是	是	G/A	G/G	C/C	*1/*2	中间代谢型		44.7	1.46	6.02	6	2	3	11.7	205
周惠娥	女	66	脑梗死	否	是	G/G	G/G	C/C	*1/*1	快代谢型	3	28.5	2.21	6.86	5.9	1.9	3.10526	10.6	280
杜华聪	男	64	多发性脑梗死	是	否	G/G	G/G	C/C	*1/*1	快代谢型	1	43.1	1.31	3.18	5.6	1.8	3.11111	10.4	153
郑能飞	女	57	短暂性大脑缺血性发作	否	是	G/G	G/G	C/C	*1/*1	快代谢型		32.2	0.7	3.46	4.4	1.4	3.14286	11.8	202
李安明	男	67	小脑梗死	否	是	G/G	G/G	C/C	*1/*1	快代谢型	0	47.6	1.65	2.67	6	1.9	3.15789	11.2	193
王丽君	女	78	高血压3级	否	是	G/G	G/G	C/C	*1/*1	快代谢型	1	26.9	1.4	4.49	3.8	1.2	3.16667	9.7	209
俞才振	男	80	双侧颈动脉狭窄	否	是	G/A	G/G	C/C	*1/*2	中间代谢型	1	43.5	0.99	4.33	4.5	1.4	3.21429	9.8	196
李杏琴	女	69	脑梗死	是	是	G/G	G/G	C/C	*1/*1	快代谢型	1	25.6	0.94	3.4	4.2	1.3	3.23077	10	248
柴森	男	38	脑梗	是	是	G/A	G/G	C/C	*1/*2	中间代谢型		32.6	2.35	3.23	5.5	1.7	3.23529	11.4	271
葛丁威	男	39	肝功能不全	否	是	G/A	G/G	C/C	*1/*2	中间代谢型	0	48.5	3.76	4.93	5.2	1.6	3.25	11.6	156
王其家	男	71	脑梗死	是	是	G/A	G/G	C/C	*1/*2	中间代谢型		48.9	1.13	2.23	4.3	1.3	3.30769	11.2	310
叶水洪	男	64	颈动脉狭窄	否	是	G/G	G/G	C/C	*1/*1	快代谢型		47.3	1.51	4.02	4	1.2	3.33333	10	267
卢明燕	男	52	脑梗死	否	是	G/A	G/G	C/C	*1/*2	中间代谢型	4	27.4	2.01	3.43	6.7	2	3.35	9	268
王文勇	男	38	脑梗死	否	是	G/G	G/G	C/C	*1/*1	快代谢型		20.8	1.32	3.99	3.7	1.1	3.36364	11.1	228
王柏益	男	65	颈动脉狭窄	是	是	G/G	G/G	C/C	*1/*1	快代谢型	0	1.7	0.42	3.03	5.6	1.6	3.5	8.8	263
何丙兴	男	50	脑梗死	是	是	G/A	G/G	C/C	*1/*2	中间代谢型		47.6	1.35	2.83	5	1.4	3.57143	11.5	142
张定方	男	60	脑梗死	否	否	G/G	G/G	C/C	*1/*1	快代谢型	1	48.5	1.97	5.89	1.8	0.5	3.6	10.4	203
韩则鸣	男	73	消化道出血	否	是	G/G	G/A	C/C	*1/*3	中间代谢型		47.3	1.13	2.62	4	1.1	3.63636	10.3	244
陈文华	男	66	脑梗死	否	是	G/G	G/G	C/C	*1/*1	快代谢型	1	26.6	1.67	4.42	6.5	1.7	3.82353	11.4	222
邱菊美	女	79	心力衰竭	是	否	G/G	G/G	C/C	*1/*1	快代谢型		28.7	1.03	3.38	5.8	1.5	3.86667	9.9	195
金贵莲	女	76	脑梗死	否	是	G/G	G/G	C/C	*1/*1	快代谢型	5	38.6	0.75	7.06	3.1	0.8	3.875	11.1	204
洪绵仁	男	45	脑梗死	否	否	G/G	G/G	C/C	*1/*1	快代谢型	1	40.5	1.38	4.62	4	1	4	11.1	210
刘云德	男	75	右侧颈动脉狭窄重度狭窄	是	是	G/A	G/G	C/C	*1/*2	中间代谢型	1	43.3	1.3	4.5	4	1	4	11.1	203
王妙英	女	86	右侧急性脑梗死	否	是	G/G	G/G	C/C	*1/*1	快代谢型		30.5	1.99	4.08	4.1	1	4.1	10.7	157
梁广	男	36	脑梗死	否	否	A/A	G/G	C/C	*2/*2	慢代谢型		6.5	1.62	3.76	8.7	2.1	4.14286	10	228
陈芳珠	女	61	脑梗死	是	否	G/G	G/G	C/C	*1/*1	快代谢型	1	30.5	4.2	3.67	6.7	1.6	4.1875	9.5	260
俞荷芳	女	70	基底动脉狭窄	否	是	G/G	G/G	C/C	*1/*1	快代谢型	1	28.5	2.02	4.51	2.1	0.5	4.2	11.2	244
王象水	男	79	下肢动脉硬化闭塞症	否	是	G/G	G/G	C/C	*1/*1	快代谢型		27.6	0.61	2.58	5.2	1.2	4.33333	9.6	264
张凤彬	男	69	短暂性大脑缺血性发作	否	否	G/A	G/G	C/C	*1/*2	中间代谢型		45.5	1.6	3.39	6.2	1.4	4.42857	10.9	98
林桂法	男	67	脑梗死	否	是	A/A	G/G	C/C	*2/*2	慢代谢型		48.5	1.26	3.22	4.5	1	4.5	10.1	234
徐水生	男	64	脑血管意外	否	是	G/A	G/G	C/C	*1/*2	中间代谢型	0	48.9	1.41	4.62	4.5	1	4.5	10.7	320
何三瑾	男	67	急性脑梗死	否	是	G/G	G/G	C/C	*1/*1	快代谢型		41.6	0.98	3.05	4.1	0.9	4.55556	9.4	211
翁承道	男	67	左侧中重度颈内动脉狭窄	否	是	G/G	G/G	C/C	*1/*1	快代谢型	0	31.1	2.16	3.96	3.2	0.7	4.57143	10	185
忻海	男	60	脑动脉供血不足	否	是	G/A	G/G	C/C	*1/*2	中间代谢型	0	43.2	0.98	3	3.1	0.6	5.16667	10	277
王初桂	男	74	脑梗死	否	是	G/A	G/G	C/C	*1/*2	中间代谢型	0	41.8	1	4.14	5.8	1.1	5.27273	8.7	191
熊友传	男	54	脑梗死	是	是	G/G	G/G	C/C	*1/*1	快代谢型		38.1	1.97	4.3	9.5	1.8	5.27778	10	300
叶亦进	男	69	脑梗死	是	是	A/A	G/G	C/C	*2/*2	慢代谢型	1	27.5	1.62	4.18	4.3	0.8	5.375	11.2	146
金仙梅	女	67	脑梗死	是	是	G/A	G/G	C/C	*1/*2	中间代谢型		40.8	2.03	5.77	7	1.3	5.38462	11.4	263
杨美满	男	54	脑梗死	否	是	G/A	G/G	C/C	*1/*2	中间代谢型	1	44.7	1.86	4.74	7	1.3	5.38462	10.4	264
胡银科	男	50	主动脉夹层A型	否	是	G/A	G/G	C/C	*1/*2	中间代谢型		48.8	1.84	5.05	4.4	0.8	5.5	10.6	141
柳友平	女	73	脑动脉狭窄	否	是	G/A	G/G	C/C	*1/*2	中间代谢型	2	17.4	1.11	3.46	5.6	1	5.6	9.5	259
冯国土	男	75	颈内动脉狭窄	否	否	G/A	G/G	C/C	*1/*2	中间代谢型	1	39.9	0.71	3.65	2.8	0.5	5.6	10	163
王家顺	男	67	双侧颈动脉狭窄	否	否	G/G	G/A	C/C	*1/*3	中间代谢型	0	23.7	0.93	3.13	4	0.7	5.71429	10.9	212
杨忠翼	男	69	脑梗死	否	是	G/A	G/G	C/C	*1/*2	中间代谢型	1	22.3	1.48	3.22	5.8	1	5.8	9.8	266
应善苗	男	62	左侧急性多发性脑梗死	是	是	G/G	G/G	C/C	*1/*1	快代谢型		39.9	1.07	4.62	4.1	0.7	5.85714	8.5	293
陈咪玉	女	67	短暂性大脑缺血性发作	否	是	G/A	G/G	C/C	*1/*2	中间代谢型	0	48.5	1.12	3.95	1.8	0.3	6	9.3	228
范炳畅	男	52	脑梗死	否	是	G/A	G/G	C/C	*1/*2	中间代谢型	1	40.5	1.54	4.93	11.4	1.8	6.33333	10.9	316
李百召	男	77	脑梗死	否	是	G/A	G/G	C/C	*1/*2	中间代谢型	2	48.5	0.6	3.45	11.2	1.7	6.58824	11.1	210
郑国庆	男	52	脑梗死	否	是	G/G	G/G	C/C	*1/*1	快代谢型	0	27.8	1.25	3.68	7.3	1.1	6.63636	10	477
严水琴	女	69	脑梗死	是	是	G/G	G/G	C/C	*1/*1	快代谢型		39.8	1.96	6.2	8.7	1.2	7.25	9.7	249
郑小东	男	42	脑梗死	否	是	G/A	G/G	C/C	*1/*2	中间代谢型	1	46.2	1.31	2.48	8.9	1.2	7.41667	10.4	251
邹强	男	44	后循环脑梗死	否	否	G/A	G/G	C/C	*1/*2	中间代谢型		39.7	1.38	3.11	5.2	0.7	7.42857	12.1	83
陈胜德	男	64	大面积脑梗死	是	是	G/G	G/G	C/C	*1/*1	快代谢型		39.2	1.2	4.6	10.2	1.3	7.84615	12.4	289
陈春夫	男	74	冠状动脉粥样硬化性心脏病	否	是	G/G	G/G	C/C	*1/*1	快代谢型		30.7	2.47	6.72	11.6	1.2	9.66667	12.5	153
戴金银	男	72	脑梗死	否	是	G/A	G/G	C/C	*1/*2	中间代谢型		0.5	0.82	3.21	9.7	0.9	10.7778	11.3	133
陈圣昌	男	75	脑梗死	否	否	G/A	G/G	C/C	*1/*2	中间代谢型	1	30.6	1.2	4.3	5.8	0.5	11.6	10.7	102
李秀芝	女	57	多发性脑梗死	否	是	G/A	G/G	C/C	*1/*2	中间代谢型	4	37.5	0.83	3.73	8.7	0.7	12.4286	10.9	255

## Sheet: logistic
性别	年龄	糖尿病	高血压	基因型	ADP末次结果	甘油三酯	胆固醇	中性粒细胞淋巴细胞		N/L	血小板平均体积	血小板	PCT/PLT
1	1	1	1	2	0	1.13	5.36	7.2	3.2	2.25	9.8	300	0.0326667
0	0	0	0	2	1	0.59	3.23	5.9	2	2.95	10.5	233	0.0450644
0	0	0	0	0	0	3	4.57	5.3	2	2.65	9.2	296	0.0310811
0	0	0	0	2	0	1.62	3.76	8.7	2.1	4.14286	10	228	0.0438596
0	0	0	1	0	0	2.76	5.85	4.5	3.3	1.36364	11.8	330	0.0357576
0	0	0	1	0	0	1.32	3.99	3.7	1.1	3.36364	11.1	228	0.0486842
0	0	1	1	1	0	2.35	3.23	5.5	1.7	3.23529	11.4	271	0.0420664
0	0	0	0	0	0	0.97	5.92	4	2	2	10.7	231	0.0463203
0	0	0	1	1	0	3.76	4.93	5.2	1.6	3.25	11.6	156	0.074359
0	0	0	0	1	1	1.2	5.4	5.4	1.1	4.90909	11	239	0.0460251
0	0	0	0	1	0	1.43	2.78	2.3	1.2	1.91667	10.1	234	0.0431624
0	0	0	1	1	0	1.31	2.48	8.9	1.2	7.41667	10.4	251	0.0414343
1	0	0	1	0	0	0.69	4.74	2.4	1.4	1.71429	11.1	240	0.04625
0	0	0	0	1	0	1.38	3.11	5.2	0.7	7.42857	12.1	83	0.145783
0	0	0	1	0	0	2.7	4.58	4.4	1.6	2.75	10.8	350	0.0308571
0	0	0	0	0	0	1.38	4.62	4	1	4	11.1	210	0.0528571
0	0	1	0	1	1	1.42	7.32	3.1	1.4	2.21429	9.8	279	0.0351254
0	0	0	1	1	1	2.96	4.84	4.1	2	2.05	8.6	274	0.0313869
0	0	0	1	1	1	1.63	4.74	5.6	1.7	3.29412	12	241	0.0497925
0	0	1	0	0	1	1.41	4.55	5.6	2.3	2.43478	11.8	186	0.0634409
0	0	0	0	2	1	0.64	3.86	3.3	2.3	1.43478	11.7	179	0.0653631
0	0	0	0	0	0	1.26	2.25	3.8	2	1.9	11.3	161	0.0701863
0	0	0	1	2	1	0.82	3.15	3.1	1.3	2.38462	11.1	186	0.0596774
1	0	1	0	1	1	0.42	2.81	4	1.7	2.35294	11.1	169	0.0656805
0	0	0	0	1	1	1.64	4.73	4.1	1.9	2.15789	9.1	325	0.028
1	0	0	0	0	0	0.4	2.82	3.9	1.5	2.6	10.3	260	0.0396154
0	0	0	1	1	1	1.85	5.86	8	2.4	3.33333	10.9	320	0.0340625
0	0	1	1	1	0	1.35	2.83	5	1.4	3.57143	11.5	142	0.0809859
0	0	0	1	1	0	1.84	5.05	4.4	0.8	5.5	10.6	141	0.0751773
0	0	0	1	1	1	1.15	3.57	4.4	1.3	3.38462	12.1	220	0.055
0	0	1	0	1	1	1.11	3.95	4	2.1	1.90476	9.6	283	0.0339223
0	0	0	1	1	0	0.98	3.5	3	1.7	1.76471	9.9	179	0.0553073
0	0	0	0	0	0	0.78	3.12	2.4	1.7	1.41176	10.6	214	0.0495327
0	0	0	1	1	0	2.01	3.43	6.7	2	3.35	9	268	0.0335821
0	0	0	1	0	0	1.25	3.68	7.3	1.1	6.63636	10	477	0.0209644
0	0	0	1	0	0	2.32	4.37	5.4	1.8	3	12.3	209	0.0588517
0	0	0	1	1	0	1.54	4.93	11.4	1.8	6.33333	10.9	316	0.0344937
0	0	0	0	1	1	0.96	2.6	2.6	1.3	2	10.6	123	0.0861789
1	0	1	1	1	1	1.82	3.49	3.5	3.9	0.897436	10.8	274	0.0394161
0	0	1	1	1	1	1.49	4.46	3.7	2.2	1.68182	10.3	206	0.05
0	0	0	1	2	1	0.84	2.24	2.8	2.3	1.21739	12.6	150	0.084
0	0	0	1	1	1	1.13	2.9	2.3	1.6	1.4375	9.5	311	0.0305466
0	0	0	1	1	1	0.62	4.96	4.8	0.8	6	10.1	334	0.0302395
0	0	1	1	0	0	1.97	4.3	9.5	1.8	5.27778	10	300	0.0333333
0	0	0	1	1	0	1.86	4.74	7	1.3	5.38462	10.4	264	0.0393939
1	0	0	0	0	1	1.23	3.65	5.5	2.6	2.11538	10.6	273	0.0388278
0	0	0	0	1	1	3.09	4.99	8.5	0.8	10.625	10.8	270	0.04
1	0	0	0	1	1	1.15	5.28	4.3	1.7	2.52941	11.1	259	0.0428571
1	0	0	1	1	0	3.21	4.39	2.4	1.4	1.71429	10.2	320	0.031875
0	0	0	1	1	1	2.25	6.87	4.6	1.8	2.55556	10.7	251	0.0426295
0	0	0	1	1	1	1.08	4.4	8.2	1.4	5.85714	10.1	239	0.0422594
1	0	0	1	1	1	1.6	4.54	2.6	1.3	2	11.2	154	0.0727273
1	0	0	1	0	0	0.7	3.46	4.4	1.4	3.14286	11.8	202	0.0584158
1	0	0	1	1	0	0.83	3.73	8.7	0.7	12.4286	10.9	255	0.0427451
0	0	1	1	0	0	0.76	3.18	5.4	1.8	3	10.1	260	0.0388462
0	0	0	0	1	0	1.05	3.31	5.7	2.4	2.375	10	138	0.0724638
0	0	0	1	0	1	1.37	4.6	5.4	2.1	2.57143	10.9	236	0.0461864
0	0	0	1	0	0	1.82	5.39	4	3	1.33333	11.5	183	0.0628415
0	0	0	0	1	0	3.05	6.81	3	1.6	1.875	10.1	197	0.051269
0	0	0	0	1	1	1.17	3.78	6.5	1.3	5	9.4	183	0.0513661
1	0	0	1	2	1	1.78	5.88	4.6	2.6	1.76923	9.9	319	0.0310345
0	0	0	1	1	1	3.05	4.94	4.2	1.8	2.33333	10.1	310	0.0325806
1	0	1	1	0	0	1.18	5.3	7.1	2.7	2.62963	9.8	362	0.0270718
1	0	0	1	1	0	1.91	2.66	5.4	2.6	2.07692	11	211	0.0521327
1	0	0	0	0	0	1.33	4.83	3.3	1.3	2.53846	8.7	221	0.0393665
0	0	0	1	1	0	1.12	4.09	3.4	2	1.7	11	266	0.0413534
0	0	0	1	2	0	1.1	2.4	3.5	1.8	1.94444	11.1	189	0.0587302
0	0	0	1	2	0	2.87	4.83	3.3	1.8	1.83333	10.7	197	0.0543147
0	0	0	0	2	0	2.1	6.27	3.2	1.6	2	9.5	207	0.0458937
0	0	0	1	1	0	0.98	3	3.1	0.6	5.16667	10	277	0.0361011
0	0	1	1	1	0	1.46	6.02	6	2	3	11.7	205	0.0570732
0	0	0	0	0	0	1.97	5.89	1.8	0.5	3.6	10.4	203	0.0512315
0	0	1	1	1	1	3.24	4.5	4.8	2.9	1.65517	9.6	201	0.0477612
0	0	0	1	0	1	1.84	6.48	3.9	1.3	3	10.35	379	0.0273087
0	1	0	0	0	0	1.01	2.65	3.9	1.5	2.6	10.5	221	0.0475113
0	1	0	0	0	0	1.01	2.65	3.9	1.5	2.6	10.5	221	0.0475113
1	1	0	0	0	0	1.28	2.88	2.7	1.4	1.92857	11.8	196	0.0602041
1	1	1	0	0	0	4.2	3.67	6.7	1.6	4.1875	9.5	260	0.0365385
0	1	1	0	0	0	1.06	4.47	4.3	1.8	2.38889	9.7	251	0.0386454
1	1	0	1	2	1	2.04	4.16	5.3	1.5	3.53333	9.8	234	0.0418803
1	1	1	1	1	1	1.3	5.66	6.6	1.8	3.66667	11.6	253	0.0458498
0	1	0	1	0	1	1.09	5.02	4.8	1.8	2.66667	9.1	196	0.0464286
0	1	0	0	0	1	1.09	4.88	3.4	1.4	2.42857	10.8	202	0.0534653
0	1	0	0	2	1	2.06	6.08	6.3	3.5	1.8	12.4	126	0.0984127
0	1	0	0	0	0	0.97	3.81	5.6	2.3	2.43478	10.5	278	0.0377698
0	1	1	1	0	0	1.07	4.62	4.1	0.7	5.85714	8.5	293	0.0290102
1	1	0	1	1	0	1.12	3.51	4	2.5	1.6	10.6	262	0.040458
1	1	1	1	1	1	1.31	3.64	4.5	1.3	3.46154	10.8	280	0.0385714
0	1	0	1	1	1	1.2	4.17	9	1	9	10	180	0.0555556
1	1	0	0	0	1	1.11	4.16	2.5	1.5	1.66667	10.6	231	0.0458874
1	1	0	1	0	1	1.58	5.25	4.2	1.6	2.625	11.1	240	0.04625
0	1	0	1	1	1	1.64	4.48	7.8	1.7	4.58824	10.9	221	0.0493213
1	1	1	0	1	1	1.25	3.96	2.5	2.1	1.19048	10.4	206	0.0504854
0	1	0	1	1	1	1.67	3.24	2.8	1.3	2.15385	11	197	0.0558376
0	1	0	1	0	1	2.05	2.78	3.7	0.9	4.11111	11.7	169	0.0692308
0	1	0	1	1	1	1.06	2.82	6.1	1.7	3.58824	11.4	250	0.0456
0	1	1	1	0	0	1.2	4.6	10.2	1.3	7.84615	12.4	289	0.0429066
0	1	1	0	0	0	1.31	3.18	5.6	1.8	3.11111	10.4	153	0.0679739
0	1	0	1	0	0	1.51	4.02	4	1.2	3.33333	10	267	0.0374532
0	1	0	1	1	0	1.41	4.62	4.5	1	4.5	10.7	320	0.0334375
0	1	0	0	2	1	1.31	3.81	4.2	1.7	2.47059	9.5	232	0.0409483
0	1	1	1	0	0	0.42	3.03	5.6	1.6	3.5	8.8	263	0.0334601
1	1	1	1	0	0	1.16	3.17	3.15	1.4	2.25	11.2	130	0.0861538
1	1	1	0	2	0	2.08	4.64	4.8	1.9	2.52632	11.9	228	0.052193
0	1	0	1	0	0	1.4	4.3	4.6	1.7	2.70588	10	199	0.0502513
1	1	1	1	1	0	0.85	3.34	2.9	1.6	1.8125	10.3	217	0.0474654
0	1	0	1	2	0	1.86	4.5	2	2.1	0.952381	10	58	0.172414
1	1	0	1	0	0	1.57	2.96	4.6	3.2	1.4375	12	230	0.0521739
0	1	0	1	2	1	1.61	3.72	6.4	2.5	2.56	9.3	334	0.0278443
0	1	0	1	1	1	1.51	4.48	6.6	1.7	3.88235	12.1	298	0.040604
1	1	0	1	1	1	1.21	3.68	2.8	1.7	1.64706	10.4	202	0.0514851
1	1	0	1	0	1	5.09	4.42	9.1	2.1	4.33333	10.1	336	0.0300595
0	1	0	1	0	0	1.67	4.42	6.5	1.7	3.82353	11.4	222	0.0513514
1	1	0	1	0	0	2.21	6.86	5.9	1.9	3.10526	10.6	280	0.0378571
0	1	1	1	1	1	1.32	4.3	7.6	1.4	5.42857	11.3	197	0.0573604
0	1	1	1	2	1	1.81	8.03	4.8	3.1	1.54839	12.4	188	0.0659574
0	1	1	1	1	1	1.83	2.96	3.4	1.3	2.61538	11	210	0.052381
1	1	0	0	1	1	1.37	6.9	8.8	1.3	6.76923	9.8	263	0.0372624
1	1	0	1	0	1	1.15	4.78	1.9	1.5	1.26667	10.4	191	0.0544503
1	1	0	1	1	1	1.2	3.79	4.6	1.6	2.875	10.6	296	0.0358108
0	1	1	1	0	1	1.24	3.3	4.4	1.4	3.14286	12.2	178	0.0685393
0	1	0	0	1	0	0.93	3.13	4	0.7	5.71429	10.9	212	0.0514151
0	1	0	1	0	0	2.16	3.96	3.2	0.7	4.57143	10	185	0.0540541
0	1	0	1	0	0	0.57	5.06	3	1.8	1.66667	11.7	206	0.0567961
1	1	1	1	1	0	2.03	5.77	7	1.3	5.38462	11.4	263	0.043346
0	1	0	1	0	0	0.98	3.05	4.1	0.9	4.55556	9.4	211	0.0445498
0	1	0	1	0	0	1.65	2.67	6	1.9	3.15789	11.2	193	0.0580311
1	1	0	1	1	0	2.23	5.52	3.6	2.2	1.63636	10.7	179	0.0597765
1	1	0	1	1	0	1.12	3.95	1.8	0.3	6	9.3	228	0.0407895
0	1	0	1	2	0	1.26	3.22	4.5	1	4.5	10.1	234	0.0431624
0	1	0	0	0	0	1.07	6.8	2.2	1.1	2	11.6	174	0.0666667
0	1	0	0	1	1	0.88	4.01	3.9	1.4	2.78571	9.8	221	0.0443439
0	1	0	1	1	1	1.07	3.31	3.1	1.2	2.58333	8.9	242	0.0367769
0	1	0	1	1	1	2.43	4.75	7.8	2.1	3.71429	10.9	188	0.0579787
1	1	0	0	1	1	1.36	7.75	1.3	1.4	0.928571	10.4	212	0.0490566
1	1	1	0	1	1	0.86	4.61	3.7	2.5	1.48	10	307	0.0325733
0	1	0	1	0	0	1.26	4.91	2.1	1.3	1.61538	10.3	236	0.0436441
0	1	0	1	0	0	1.66	4.05	4.3	1.6	2.6875	10.6	240	0.0441667
0	1	0	1	0	0	1.19	3.03	4.3	1.7	2.52941	10.4	260	0.04
0	1	0	0	0	0	1.61	3.62	3.6	1.9	1.89474	9.2	229	0.0401747
0	1	1	0	1	0	1.09	5.11	5.4	2.2	2.45455	10.6	219	0.0484018
0	1		0	0	1	1.11	3.73	5.6	1.2	4.66667	10.3	206	0.05
0	1	0	1	2	1	0.89	2.65	3.6	1.9	1.89474	10.6	207	0.0512077
0	1	0	0	0	0	4.83	7	4.6	1.8	2.55556	11.2	266	0.0421053
0	1	0	1	1	0	1.48	3.22	5.8	1	5.8	9.8	266	0.0368421
0	1	0	1	0	0	1.21	2.7	4.4	2	2.2	10.4	222	0.0468468
1	1	1	1	0	0	0.94	3.4	4.2	1.3	3.23077	10	248	0.0403226
0	1	1	1	2	0	1.62	4.18	4.3	0.8	5.375	11.2	146	0.0767123
1	1	1	1	0	0	1.96	6.2	8.7	1.2	7.25	9.7	249	0.0389558
0	1	0	0	1	0	1.6	3.39	6.2	1.4	4.42857	10.9	98	0.111224
0	1	0	1	1	1	1.68	3.35	7.9	1.7	4.64706	10.8	325	0.0332308
0	1	0	1	0	1	0.87	2.51	7.3	0.9	8.11111	10.7	258	0.0414729
0	1	0	0	0	0	0.89	4.54	3.9	1.5	2.6	10.7	210	0.0509524
1	1	0	1	0	0	2.02	4.51	2.1	0.5	4.2	11.2	244	0.0459016
1	1	1	1	1	0	1.12	4.64	2.9	1.6	1.8125	10	322	0.0310559
0	1	0	0	1	1	1.16	4.46	4	1.3	3.07692	10.4	270	0.0385185
0	1	1	1	2	1	2.1	6.8	5.9	2.2	2.68182	10.1	332	0.0304217
0	1	0	1	1	0	3.93	5.88	4.4	1.6	2.75	9.7	388	0.025
0	1	1	1	2	0	1.9	5.84	6	2.2	2.72727	11.1	214	0.0518692
0	1	1	1	1	0	1.13	2.23	4.3	1.3	3.30769	11.2	310	0.036129
0	1	0	1	1	1	1.2	5.4	3.5	1.8	1.94444	11.2	193	0.0580311
1	1	0	1	1	1	1.29	5.99	2.3	3	0.766667	12.6	148	0.0851351
0	1	0	1	1	0	0.82	3.21	9.7	0.9	10.7778	11.3	133	0.0849624
1	1	0	1	0	0	4.25	5.4	2.5	2.8	0.892857	10.6	277	0.0382671
0	1	0	0	2	0	0.8	3.28	5.2	1.9	2.73684	11.1	170	0.0652941
0	1	0	0	2	1	1.25	4.81	8.5	0.4	21.25	10.4	211	0.0492891
0	1	0	0	1	1	0.83	3.36	5.6	1.7	3.29412	10.6	430	0.0246512
1	1	0	1	1	0	1.11	3.46	5.6	1	5.6	9.5	259	0.0366795
0	1	0	1	1	0	1.13	2.62	4	1.1	3.63636	10.3	244	0.0422131
0	1	0	1	2	1	1.67	6.25	3.5	1.3	2.69231	11.4	202	0.0564356
0	1	0	1	2	1	0.97	3.91	3.7	1.4	2.64286	10.7	214	0.05
0	1	0	0	1	1	0.64	3.05	3.4	1.1	3.09091	10.8	163	0.0662577
0	1	0	1	0	0	2.47	6.72	11.6	1.2	9.66667	12.5	153	0.0816993
0	1		1	1	0	1	4.14	5.8	1.1	5.27273	8.7	191	0.0455497
0	1	0	1	0	1	1.5	5.25	5.1	1.6	3.1875	11.1	207	0.0536232
0	1	0	0	0	1	0.99	4.07	7.6	1.2	6.33333	10.9	201	0.0542289
0	1	0	1	1	1	0.89	3.81	4	1.7	2.35294	9.6	192	0.05
0	1	1	1	1	1	1.3	5.7	8.4	0.9	9.33333	11.9	138	0.0862319
1	1	0	1	2	1	3.14	4.34	5.3	1.4	3.78571	10.7	222	0.0481982
0	1	0	1	1	1	0.52	2.33	4.2	1.1	3.81818	10.5	162	0.0648148
0	1	0	0	1	0	1.2	4.3	5.8	0.5	11.6	10.7	102	0.104902
0	1	0	1	1	0	1.3	4.62	3.2	1.1	2.90909	11.3	137	0.0824818
0	1	0	0	1	0	0.71	3.65	2.8	0.5	5.6	10	163	0.0613497
0	1	1	1	1	0	1.3	4.5	4	1	4	11.1	203	0.0546798
0	1	0	1	1	0	0.7	5.18	4.3	2.1	2.04762	11.3	450	0.0251111
0	1	1	1	0	0	1.82	3.05	3	1.4	2.14286	11.6	122	0.095082
0	1	0	1	1	1	1.1	3.2	3.1	1.1	2.81818	9.7	225	0.0431111
0	1	0	0	2	1	0.61	3.48	3.5	1.4	2.5	11.2	205	0.0546341
0	1	0	1	0	1	1.19	5.47	3.7	2.3	1.6087	11.9	224	0.053125
1	1	1	1	1	1	1.49	4.01	3	2	1.5	11.3	228	0.0495614
1	1	0	1	2	1	2.9	5.4	2.7	1.2	2.25	10.8	182	0.0593407
1	1	0	1	0	0	0.75	7.06	3.1	0.8	3.875	11.1	204	0.0544118
0	1	0	0	0	0	0.99	2.79	5.4	2	2.7	9.8	212	0.0462264
1	1	0	1	0	0	2.58	4.88	3.9	2.2	1.77273	10.8	245	0.0440816
1	1	0	1	1	0	0.57	4.19	4.2	1.7	2.47059	10.9	200	0.0545
0	1	0	0	2	1	0.94	3.44	4.66	1.4	3.32857	10.6	157	0.0675159
0	1	1	1	0	0	1.12	3.78	4.3	2.2	1.95455	10.5	240	0.04375
0	1	0	1	1	0	0.6	3.45	11.2	1.7	6.58824	11.1	210	0.0528571
1	1	1	0	1	1	1.79	5.8	4.7	1.4	3.35714	10.7	303	0.0353135
1	1	0	1	0	0	1.4	4.49	3.8	1.2	3.16667	9.7	209	0.0464115
0	1	0	1	1	1	1.36	4.97	4	1.5	2.66667	9.5	277	0.034296
0	1	0	1	1	1	0.92	2.98	3.7	1.4	2.64286	10.2	349	0.0292264
0	1	0	1	0	0	0.61	2.58	5.2	1.2	4.33333	9.6	264	0.0363636
1	1	1	0	0	0	1.03	3.38	5.8	1.5	3.86667	9.9	195	0.0507692
0	1	0	1	1	1	0.66	2.62	3.1	0.9	3.44444	9.5	132	0.0719697
0	1	0	0	0	1	0.84	3.78	4.3	1.3	3.30769	11.7	230	0.0508696
0	1	0	1	0	1	1.18	5.48	3.1	0.9	3.44444	10.8	136	0.0794118
0	1	0	1	0	0	0.4	2.84	2.6	1.3	2	11.2	310	0.036129
0	1	0	1	1	0	0.99	4.33	4.5	1.4	3.21429	9.8	196	0.05
1	1	0	0	2	1	1.09	3.6	3.8	1.2	3.16667	10	277	0.0361011
0	1	0	1	0	0	1.2	3.63	1.9	2.2	0.863636	10.9	152	0.0717105
0	1	0	1	1	0	1.44	4.69	4.1	1.7	2.41176	9.9	297	0.0333333
1	1	0	1	0	0	1.99	4.08	4.1	1	4.1	10.7	157	0.0681529
1	1	0	1	0	0	0.73	2.57	2.5	1	2.5	9.8	178	0.0550562
